# Supplementary material for: A composition-dependent molecular clutch between T cell signaling condensates and actin
Source: eLife journal article supplement (doi:10.7554/elife.42695), 2019-07-03

Figure 4 - figure supplement 3

Grb2 - Untreated Cells  
(Figure 4)

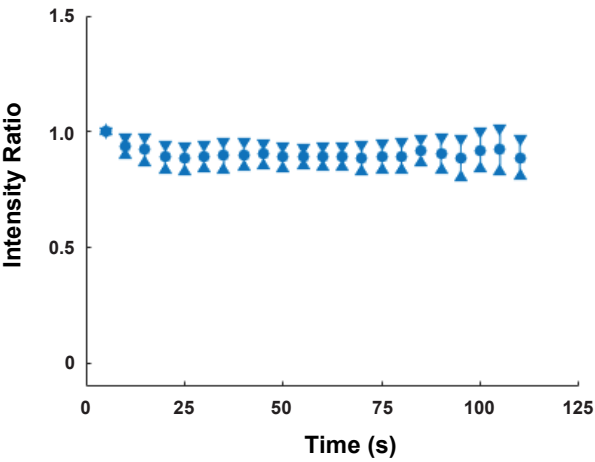

Nck - Untreated Cells  
(Figure 4)

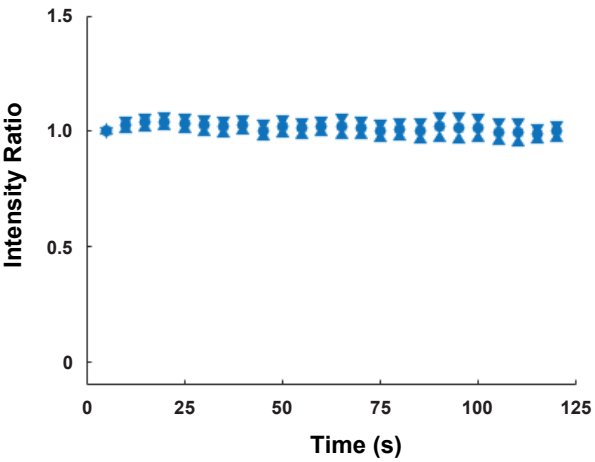

Nck - DMSO-treated Cells  
(Figure 6)

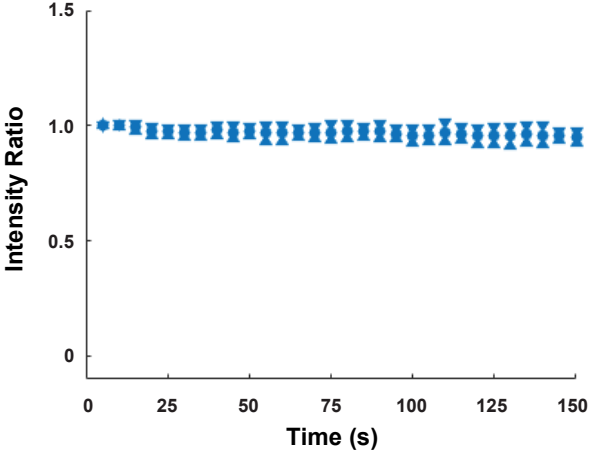

Nck - SMIFH2-treated Cells  
(Figure 6)

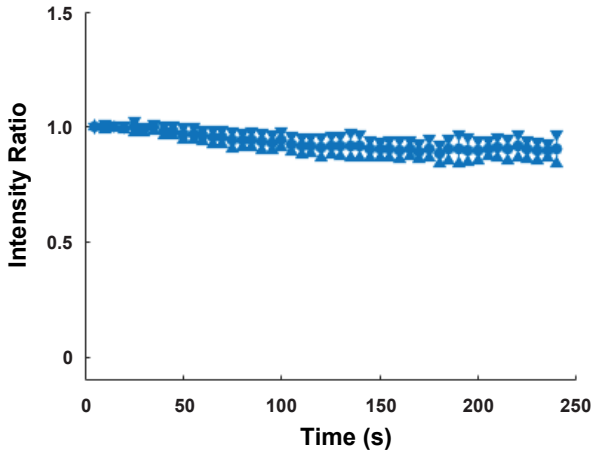

Supplement: supp [file elife-42695-supp-v1.zip]
