# Supplementary material for: A composition-dependent molecular clutch between T cell signaling condensates and actin
Source: eLife journal article supplement (doi:10.7554/elife.42695), 2019-07-03
Supplement: supp [file elife-42695-supp-v1.zip]

Figure 4 - figure supplement 6

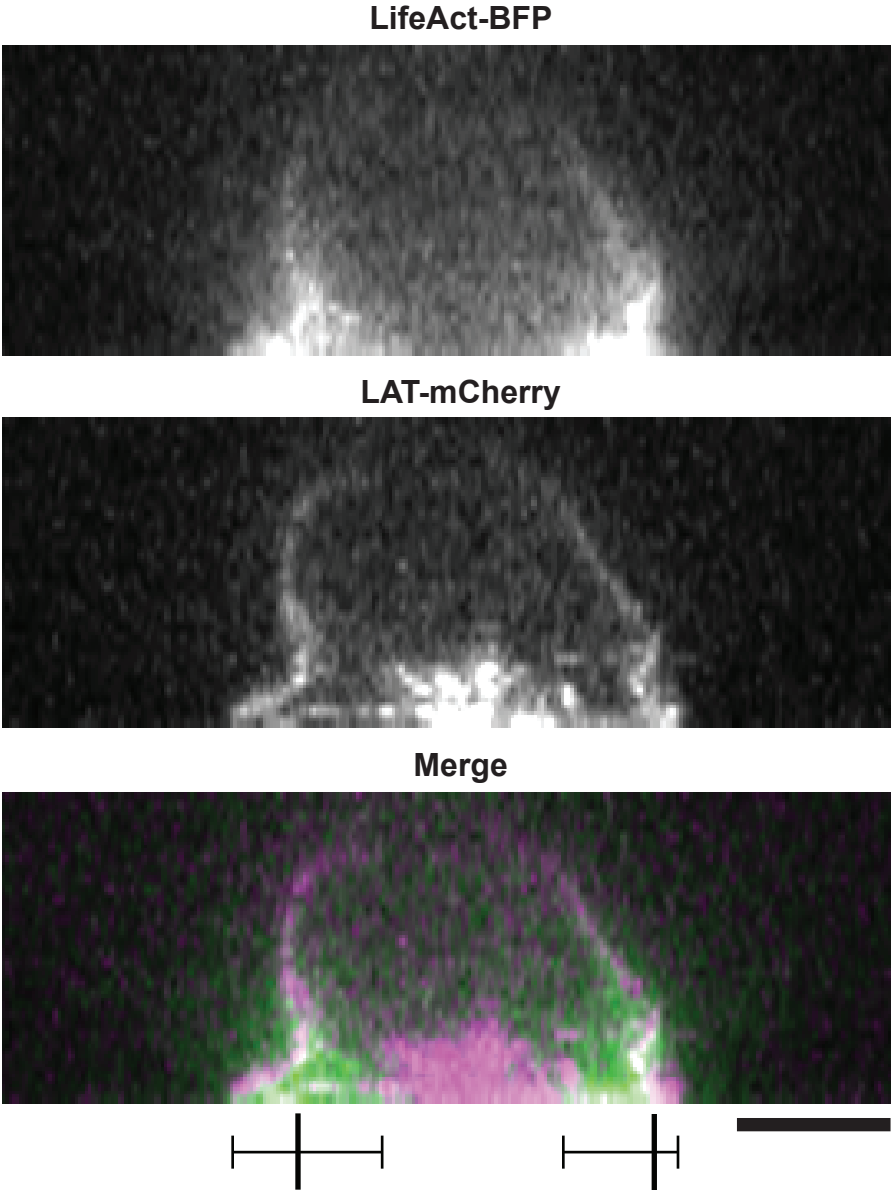

┌─┴─┐ Dense actin band localization  
┆ Change in 3-dimensional cell architecture
