# Supplementary material for: A composition-dependent molecular clutch between T cell signaling condensates and actin
Source: eLife journal article supplement (doi:10.7554/elife.42695), 2019-07-03
Supplement: supp [file elife-42695-supp-v1.zip]

Archive with 45 entries (45 files):
- elife_poa_e42695_Figure_4_figure_supplement_1.pdf
- elife_poa_e42695_Figure_3_figure_supplement_2.pdf
- elife_poa_e42695_Video_6.avi
- elife_poa_e42695_Figure_1_source_data_1.txt
- elife_poa_e42695_Video_12.avi
- elife_poa_e42695_Figure_3_figure_supplement_3.pdf
- elife_poa_e42695_Figure_3_source_data_3.txt
- elife_poa_e42695_Video_1.avi
- elife_poa_e42695_Video_10.avi
- elife_poa_e42695_Figure_4_figure_supplement_6.pdf
- elife_poa_e42695_Video_5.avi
- elife_poa_e42695_Figure_4_figure_supplement_4.pdf
- elife_poa_e42695_Figure_3_figure_supplement_1_source_data_1.txt
- elife_poa_e42695_Figure_3_figure_supplement_7.pdf
- elife_poa_e42695_Figure_3_figure_supplement_5_source_data_1.txt
- elife_poa_e42695_Figure_3_figure_supplement_6_source_data_1.txt
- elife_poa_e42695_Figure_4_figure_supplement_3.pdf
- elife_poa_e42695_Video_9.avi
- elife_poa_e42695_Figure_3_source_data_1.txt
- elife_poa_e42695_Figure_6_figure_supplement_1.pdf
- elife_poa_e42695_Figure_4_figure_supplement_2.pdf
- elife_poa_e42695_Figure_4_figure_supplement_5.pdf
- elife_poa_e42695_Video_4.avi
- elife_poa_e42695_Figure_3_figure_supplement_5.pdf
- elife_poa_e42695_Figure_1_figure_supplement_1.pdf
- elife_poa_e42695_Video_3.avi
- elife_poa_e42695_Figure_4_source_data_1.txt
- elife_poa_e42695_Video_2.avi
- elife_poa_e42695_Figure_3_figure_supplement_3_source_data_1.txt
- elife_poa_e42695_Video_7.avi
- elife_poa_e42695_Figure_3_source_data_2.txt
- elife_poa_e42695_Figure_3_figure_supplement_2_source_data_1.txt
- elife_poa_e42695_Transparent_Reporting_File.pdf
- elife_poa_e42695_Figure_2_figure_supplement_1.pdf
- elife_poa_e42695_Figure_3_figure_supplement_4.pdf
- elife_poa_e42695_Figure_3_figure_supplement_8.pdf
- elife_poa_e42695_Figure_3_figure_supplement_1.pdf
- elife_poa_e42695_Figure_3_figure_supplement_2_source_data_2.txt
- elife_poa_e42695_Video_8.avi
- elife_poa_e42695_Figure_3_figure_supplement_6.pdf
- elife_poa_e42695_Supplementary_file_1.xlsx
- elife_poa_e42695_Figure_3_figure_supplement_8_source_data_1.txt
- elife_poa_e42695_Figure_3_figure_supplement_4_source_data_1.txt
- elife_poa_e42695_Video_11.avi
- elife_poa_e42695_Figure_5_figure_supplement_1.pdf
