# Supplementary material for: A composition-dependent molecular clutch between T cell signaling condensates and actin
Source: eLife journal article supplement (doi:10.7554/elife.42695), 2019-07-03
Supplement: supp [file elife-42695-supp-v1.zip › elife_poa_e42695_Figure_1_source_data_1.txt]

Sos1	SLP-76	Nck	N-WASP
1.0796	1.1095	1.2636	1.3353
1.0693	1.0686	1.2349	1.3419
1.0667	1.0874	1.2459	1.3345
1.0690	1.0888	1.2309	1.3867
1.1884	1.1999	1.2869	1.7301
1.2600	1.1461	1.4067	1.6868
1.1965	1.1465	1.4159	1.6272
1.2196	1.1051	1.3830	1.5993
1.2459	1.1869	1.3478	1.6616
1.1238	1.2832	1.3962	1.4786
1.1496	1.2552	1.2550	1.5193
1.1712	1.2919	1.3090	1.5076
1.1199	1.3085	1.2862	1.6107
1.1333	1.2615	1.1729
	1.2456	1.2023
