# Supplementary material for: A composition-dependent molecular clutch between T cell signaling condensates and actin
Source: eLife journal article supplement (doi:10.7554/elife.42695), 2019-07-03

Figure 2 - figure supplement 1

A) Photo-damage from light exposure in experiments with pLAT → N-WASP<sub>Neutral</sub> condensates in contracting actin networks. Condensate localization to actin within the Field of View (FoV) differs from condensate localization to actin outside of the FoV

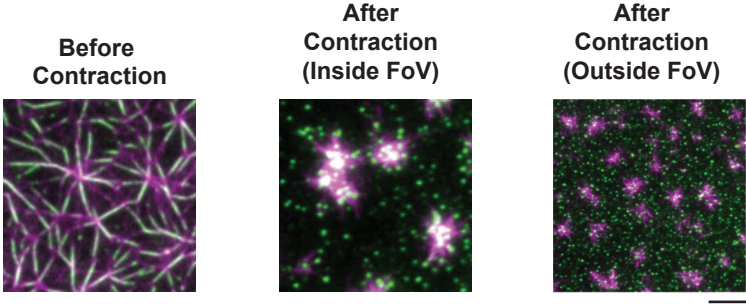

B) Minimal photo-damage from light exposure in experiments with pLAT condensates in contracting actin networks

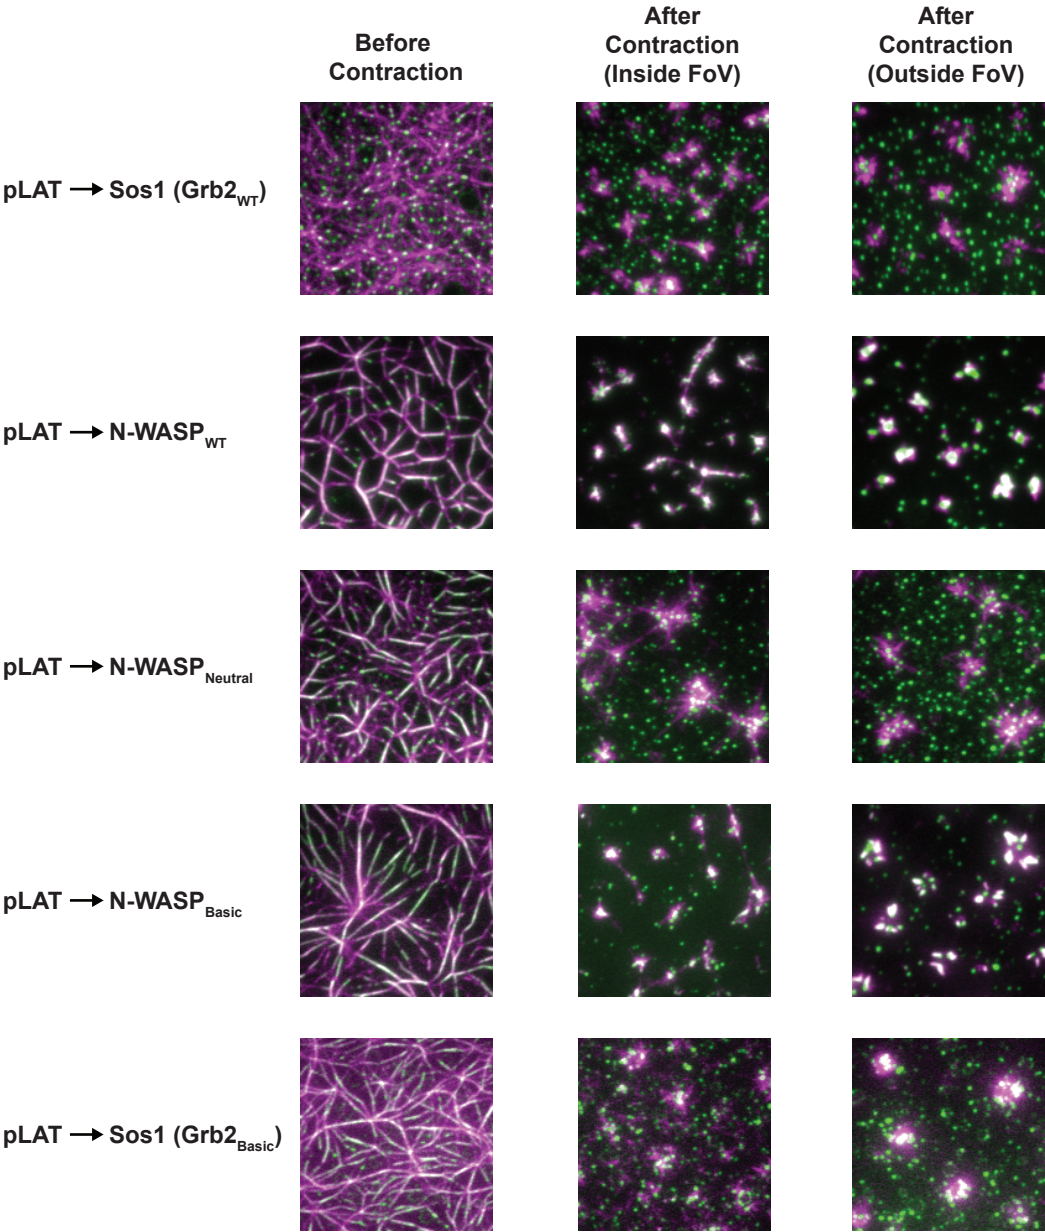

Supplement: supp [file elife-42695-supp-v1.zip › elife_poa_e42695_Figure_2_figure_supplement_1.pdf]
