# Supplementary material for: A composition-dependent molecular clutch between T cell signaling condensates and actin
Source: eLife journal article supplement (doi:10.7554/elife.42695), 2019-07-03
Supplement: supp [file elife-42695-supp-v1.zip › elife_poa_e42695_Figure_3_figure_supplement_1_source_data_1.txt]

Nck	WIP-N-WASP	WIP-WASP
2316.791	9072.228	6187.000
2344.062	11226.694	6250.884
2358.079	11417.254	6895.745
2528.628	13470.809	7566.996
2541.078	14641.412	10030.476
2981.271	9754.454	6607.131
3039.089	9810.425	7411.066
3113.468	10620.783	7638.138
3262.208	10662.741	7639.083
3314.440	10697.173	8569.008
2667.458	11473.398	6503.037
2793.689	12512.092	6774.342
2899.026	12881.359	7095.116
2903.251	13356.155	7333.452
2987.590	13528.838	8048.074
