# Supplementary material for: A composition-dependent molecular clutch between T cell signaling condensates and actin
Source: eLife journal article supplement (doi:10.7554/elife.42695), 2019-07-03
Supplement: supp [file elife-42695-supp-v1.zip › elife_poa_e42695_Figure_3_figure_supplement_2.pdf]

Figure 3 - figure supplement 2

A)

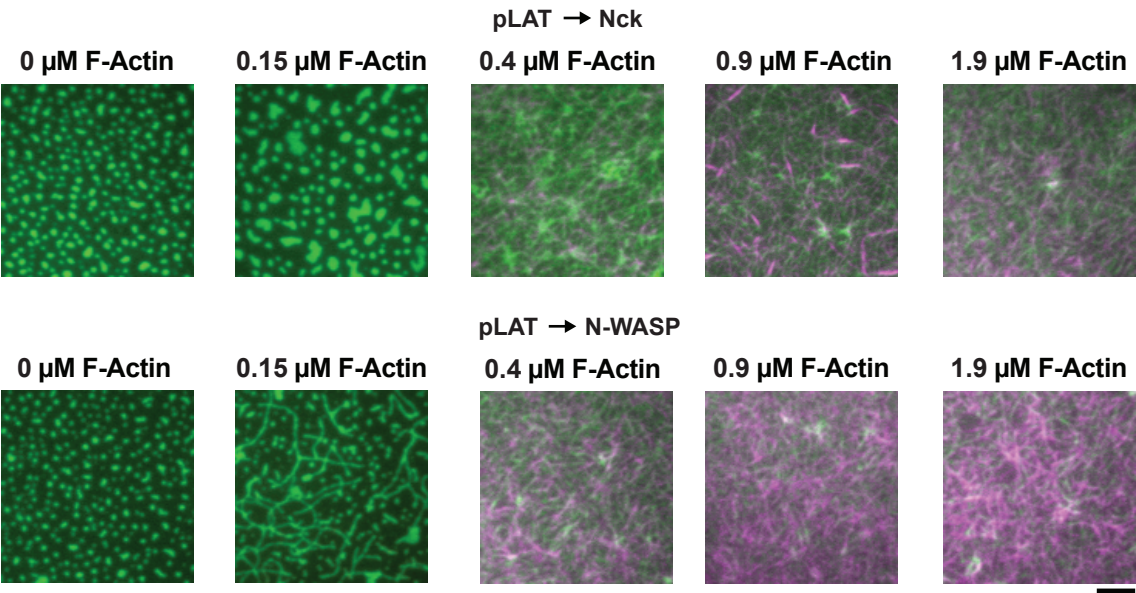

B)

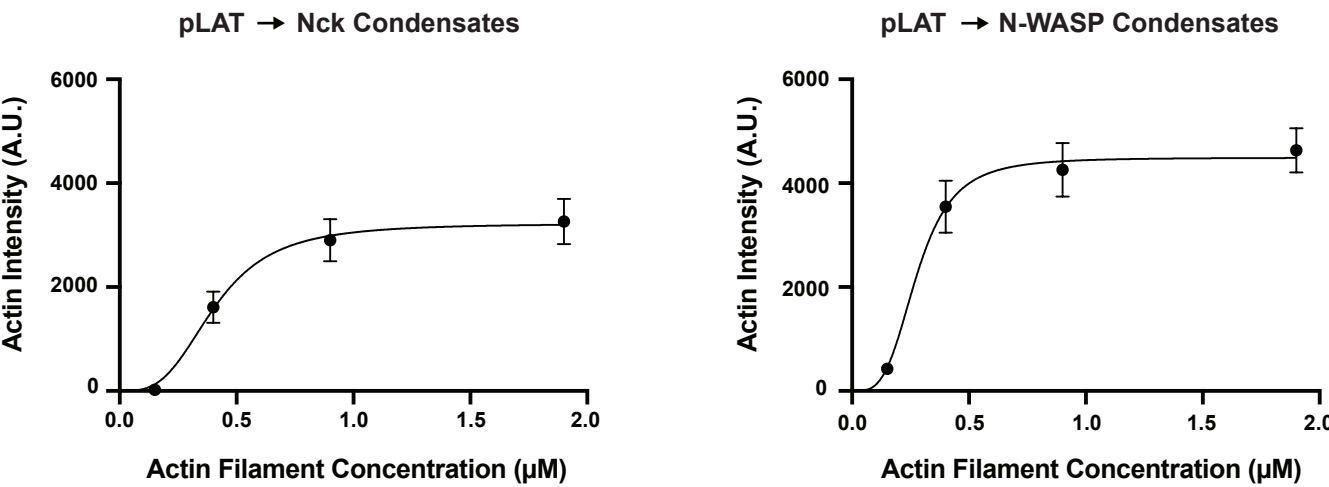

C)

|                                 | Calculated<br>K <sub>D</sub> (nM) | Hill<br>Coefficient      | BMax<br>(A.U.)              |
|---------------------------------|-----------------------------------|--------------------------|-----------------------------|
| pLAT →<br>Nck<br>Condensates    | 410<br>95% CI [380, 450]          | 3.2<br>95% CI [2.4, 5.6] | 3200<br>95% CI [3000, 3400] |
| pLAT →<br>N-WASP<br>Condensates | 280,<br>95% CI [250, 300]         | 3.6<br>95% CI [2.9, 4.4] | 4500<br>95% CI [4300, 4700] |
