# Supplementary material for: A composition-dependent molecular clutch between T cell signaling condensates and actin
Source: eLife journal article supplement (doi:10.7554/elife.42695), 2019-07-03
Supplement: supp [file elife-42695-supp-v1.zip › elife_poa_e42695_Figure_3_figure_supplement_2_source_data_1.txt]

LAT.Nck 0 uM F-Actin	LAT.Nck 0.15uM F-Actin	LAT.Nck 0.4uM F-Actin	LAT.Nck 0.9uM F-Actin	LAT.Nck 2.0uM Actin
7.048	64.905	1522.889	3547.966	3493.261
3.686	78.706	1288.201	2997.308	3568.303
4.599	67.954	1505.681	2760.343	3051.735
4.752	92.447	2294.027	3530.654	2689.716
5.676	3.456	1441.503	2757.306	3540.156
6.079	8.961	1545.561	3514.311	3806.530
8.695	5.062	1669.513	3025.741	2984.424
4.652	6.350	1618.016	2705.298	2729.972
5.444	9.184	1343.866	2266.047	2834.199
5.169	5.285	1355.182	2625.753	2436.529
4.380	3.222	1748.094	2571.355	3469.705
5.562	3.468	1825.530	3307.661	3687.882
0.905	2.748	2049.137	2650.669	3714.222
4.078	4.009	1154.668	2833.020	3602.597
0.901	3.486	1794.854	2460.585	3354.331
