# Supplementary material for: A composition-dependent molecular clutch between T cell signaling condensates and actin
Source: eLife journal article supplement (doi:10.7554/elife.42695), 2019-07-03
Supplement: supp [file elife-42695-supp-v1.zip › elife_poa_e42695_Figure_3_figure_supplement_2_source_data_2.txt]

LAT.NWASP 0 uM F-Actin	LAT.NWASP 0.15uM F-Actin	LAT.NWASP 0.4uM F-Actin	LAT.NWASP 0.9uM F-Actin	LAT.NWASP 1.9uM Actin
6.021	388.855	3794.335	5243.111	4520.011
4.850	376.290	3304.437	4670.969	4147.956
6.907	421.292	3121.092	3675.185	4641.136
4.328	418.262	3255.755	4526.750	4676.005
5.493	385.021	4099.861	4305.884	3747.686
2.914	414.777	2955.265	3658.851	4446.954
1.894	369.184	3640.041	4192.261	4826.020
2.350	531.142	3361.467	4294.135	4569.397
2.015	450.193	4000.897	4636.933	3871.089
2.842	330.103	2840.453	3681.790	3712.874
1.696	511.098	3526.380	4664.401	5400.693
21.453	379.490	3509.793	5103.013	5421.690
29.115	553.386	4954.982	4483.021	4829.977
33.251	470.934	3510.470	3912.653	4565.379
27.310	447.392	3822.635	3663.090	4759.662
