# Supplementary material for: A composition-dependent molecular clutch between T cell signaling condensates and actin
Source: eLife journal article supplement (doi:10.7554/elife.42695), 2019-07-03
Supplement: supp [file elife-42695-supp-v1.zip › elife_poa_e42695_Figure_3_figure_supplement_3_source_data_1.txt]

Nck:Actin 1:1	Nck:Actin 1:2	Nck:Actin 1:4	N-WASP:Actin 1:1	N-WASP:Actin 1:2	N-WASP:Actin 1:4
0.086845916	0.066054981	0.067882059	0.137521437	0.137580590	0.224781112
0.121722489	0.115929639	0.136745286	0.134135925	0.145900561	0.248925505
0.099087082	0.107900328	0.097994953	0.160342284	0.168929399	0.252150187
