# Supplementary material for: A composition-dependent molecular clutch between T cell signaling condensates and actin
Source: eLife journal article supplement (doi:10.7554/elife.42695), 2019-07-03
Supplement: supp [file elife-42695-supp-v1.zip › elife_poa_e42695_Figure_3_figure_supplement_4_source_data_1.txt]

N-WASP + Actin	Nck > N-WASP + Actin	pSLP-76 > N-WASP + Actin	Grb2 > N-WASP + Actin	pLAT > N-WASP + Actin
0.198399421	0.191498011	0.212060660	0.188837491	0.206075865
0.191501618	0.189698527	0.189876856	0.204354870	0.192524369
0.198574562	0.199786414	0.212757368	0.223700764	0.206786872
