# Supplementary material for: A composition-dependent molecular clutch between T cell signaling condensates and actin
Source: eLife journal article supplement (doi:10.7554/elife.42695), 2019-07-03
Supplement: supp [file elife-42695-supp-v1.zip › elife_poa_e42695_Figure_3_figure_supplement_5_source_data_1.txt]

His-Nck-Full-Length	His-Nck-Full-Length-ΔL1	His-Nck-L1-S2-L2-S3-L3-SH2	His-Nck-L1(KtoE)-S2-L2-S3-L3-SH2	His-Nck-L1(HM)-S2-L2-S3-L3-SH2	His-Nck-L3-SH2	His-Nck-S1	His-Nck-S1-L1-S2-L2-S3	His-Nck-S1-L1-S3-L3-SH2	His-Nck-S2	His-Nck-S2-L2-S3-L3-SH2	His-Nck-S3	His-Nck-S3-L3-SH2	His-pLAT	SLB No His Protein
1672.066	359.697	1746.424	83.714	260.570	1201.659	73.195	157.138	2248.968	128.596	317.426	141.058	1649.222	72.720	105.581
1793.764	363.780	1917.639	86.929	263.355	1436.909	74.015	158.627	2258.545	132.101	326.405	150.334	1696.007	73.073	106.803
1939.991	370.471	1926.113	89.409	280.700	1763.642	142.900	160.114	2383.193	140.421	343.039	152.636	1766.575	73.454	119.102
1956.231	372.564	2070.071	92.428	289.332	1975.486	147.947	161.959	2430.629	161.374	346.963	155.036	1905.803	80.889	119.439
1969.443	375.073	2080.371	95.636	294.021	1975.995	148.726	163.563	2802.691	162.250	359.890	156.024	2003.843	80.989	129.933
2007.613	413.086	2103.206	100.724	375.996	1994.093	157.833	167.340	2819.141	168.530	378.082	159.166	2262.225	81.352	131.036
2030.626	416.539	2232.358	101.519	393.100	2021.027	165.281	168.606	2914.884	169.850	379.807	162.797	2300.327	83.076	147.003
2113.504	433.624	2272.153	102.467	487.443	2094.002	167.155	169.028	2955.144	169.966	386.588	163.284	2403.205	83.421	158.791
2131.101	442.008	2283.730	103.444	528.552	2096.699	170.855	169.792	3058.711	171.155	395.978	165.417	2460.272	83.725	160.091
2172.723	450.962	2284.809	104.720	540.398	2139.167	172.475	171.827	3141.965	171.657	423.487	165.418	2546.530	83.979	160.625
2247.247	459.914	2301.078	109.555	557.195	2171.942	173.793	172.432	3169.916	171.812	430.933	165.916	2601.447	85.284	161.497
2257.699	461.491	2393.576	111.106	560.134	2176.298	174.203	172.722	3189.635	171.865	439.941	166.283	2658.719	85.694	161.544
2273.782	466.539	2418.724	111.799	609.349	2271.858	174.604	179.357	3291.717	172.719	465.135	169.676	2700.694	86.962	165.010
2320.407	650.913	2464.864	118.025	661.653	2297.240	174.802	182.252	3320.031	173.631	481.225	170.363	3227.832	88.176	167.619
2342.037	698.720	2487.930	123.727	671.711	2426.358	174.888	243.356	3394.560	174.703	502.468	173.925	3402.207	88.266	170.987
