# Supplementary material for: A composition-dependent molecular clutch between T cell signaling condensates and actin
Source: eLife journal article supplement (doi:10.7554/elife.42695), 2019-07-03
Supplement: supp [file elife-42695-supp-v1.zip › elife_poa_e42695_Figure_3_figure_supplement_6_source_data_1.txt]

25nM His-pLAT	25nM His-Nck Basic	25nM His-Nck WT	25nM His-Nck GGSA	25nM His-Nck KtoE	50nM His-pLAT	50nM His-Nck Basic	50nM His-Nck WT	50nM His-Nck GGSA	50nM His-Nck KtoE	100nM His-pLAT	100nM His-Nck Basic	100nM His-Nck WT	100nM His-Nck GGSA	100nM His-Nck KtoE
1243.946	2528.933	2056.498	1172.038	1173.252	1124.828	4497.646	3165.100	1795.375	1152.453	1611.619	8105.079	5413.208	1284.381	1180.970
1240.345	2575.008	1845.698	1163.103	1172.453	1127.607	4676.048	4830.503	1815.613	1135.318	1583.633	8247.603	5748.006	1540.861	1175.725
1244.147	2605.874	2127.135	1159.644	1172.352	1126.542	4610.535	4030.510	1633.235	1133.911	1417.217	7203.481	6028.261	1618.181	1174.018
1234.615	2629.446	1891.530	1161.415	1167.742	1125.506	4661.698	3828.924	1478.902	1137.508	1338.967	9019.197	6275.712	1642.291	1149.609
1237.210	2666.139	1825.369	1160.880	1164.279	1123.391	4318.302	4295.429	1433.726	1135.830	1354.550	9145.559	5509.870	1542.806	1146.342
1243.411	2446.138	2109.102	1161.262	1163.774	1126.241	4354.591	4361.017	1418.912	1133.747	1434.146	9268.777	6734.980	1628.485	1139.478
1239.928	2439.715	1858.339	1156.804	1160.294	1137.663	4189.522	4136.265	1481.641	1140.203	1426.710	8964.197	6428.198	1709.698	1137.247
1241.493	2576.663	1953.192	1168.580	1158.917	1135.344	4190.336	3488.600	1528.699	1146.309	1343.067	8767.925	5635.540	1682.740	1143.948
1240.615	2544.288	2081.323	1189.127	1155.784	1138.411	4541.145	4179.887	1729.463	1149.731	1312.988	9099.054	6653.265	1610.186	1146.746
