# Supplementary material for: A composition-dependent molecular clutch between T cell signaling condensates and actin
Source: eLife journal article supplement (doi:10.7554/elife.42695), 2019-07-03
Supplement: supp [file elife-42695-supp-v1.zip › elife_poa_e42695_Figure_3_figure_supplement_8_source_data_1.txt]

10nM His-WIPNWASP-GGS	10nM His-WIPNWASP-WT	10nM His-WIPNWASP-DB	10nM His-BPVCA	25nM His-WIPNWASP-GGS	25nM His-WIPNWASP-WT	25nM His-WIPNWASP-DB	25nM His-BPVCA	50nM His-WIPNWASP-GGS	50nM His-WIPNWASP-WT	50nM His-WIPNWASP-DB	50nM His-BPVCA	25nM His-Nck-WT	50nM His-Nck-WT
486.566	525.554	2085.664	476.288	587.912	864.203	4191.852	2216.173	705.758	1727.590	13587.963	2024.072	263.689	835.685
505.554	527.602	2150.992	479.237	588.628	864.784	4357.392	2289.029	733.334	1768.593	13801.969	2125.600	267.583	845.234
506.251	538.012	2259.845	479.790	590.222	868.996	4638.530	2458.169	746.498	1783.428	14504.134	2167.240	283.175	969.034
510.226	538.730	2393.525	481.573	599.077	910.206	5073.384	2465.551	774.389	1823.411	14597.065	2218.840	291.998	995.301
517.106	540.030	2490.045	487.640	600.089	914.066	5770.046	2559.205	775.303	1865.930	14625.945	2290.159	300.085	1025.213
517.510	543.375	2519.794	502.246	608.946	930.341	6330.075	2585.751	776.746	1926.671	14947.209	2296.436	314.947	1042.910
519.631	545.434	2546.842	507.903	616.208	943.233	6920.727	2598.587	808.098	1974.603	15370.600	2352.994	318.484	1053.942
530.278	550.354	2571.178	509.141	622.266	968.644	7067.376	2619.378	828.867	1982.171	15454.151	2400.873	320.837	1062.214
533.551	550.636	2679.767	522.195	626.571	973.445	7518.320	2696.243	834.767	2107.129	15589.141	2429.530	325.163	1103.174
553.016	552.088	2710.291	541.574	626.965	981.238	7647.817	2704.882	836.590	2144.536	15783.685	2459.239	332.942	1158.752
562.514	560.734	2781.853	546.428	628.640	989.753	7980.984	2903.934	839.790	2158.672	15880.814	2466.665	366.413	1393.854
574.555	565.971	2899.970	548.793	629.594	1001.902	8074.263	2955.950	871.689	2186.964	15915.043	2487.492	368.992	1402.723
576.040	570.936	2921.428	553.969	629.881	1009.635	8145.310	2961.524	897.034	2241.376	16003.437	2616.210	413.140	1450.076
576.708	591.777	3180.010	555.046	645.260	1019.754	8462.549	3336.962	929.088	2558.658	16104.496	2913.197	429.846	1497.856
597.709	612.328	3380.596	587.067	664.775	1033.744	8861.212	3552.881	937.188	2563.149	16172.701	3091.237	441.054	1529.904
