# Supplementary material for: A composition-dependent molecular clutch between T cell signaling condensates and actin
Source: eLife journal article supplement (doi:10.7554/elife.42695), 2019-07-03
Supplement: supp [file elife-42695-supp-v1.zip › elife_poa_e42695_Figure_3_source_data_1.txt]

pLAT	pLAT Grb2	pLAT Grb2 Sos1	pLAT Grb2 Sos1 pSLP-76	pLAT Grb2 Sos1 pSLP-76 Nck	pLAT Grb2 Sos1 pSLP-76 Nck WIP-N-WASP
262.878	265.695	236.269	342.575	1009.448	2246.856
268.202	267.470	240.550	343.890	1079.575	2379.804
271.407	285.039	253.257	344.232	1202.852	2609.863
273.828	286.678	263.435	348.199	1276.888	3890.843
277.204	287.779	288.190	348.505	1247.144	4031.638
279.131	290.780	301.048	357.155	1311.046	4264.246
280.252	292.561	303.269	366.869	1381.193	4410.021
283.456	296.187	309.534	368.228	1386.329	5602.270
284.977	296.276	316.655	368.237	1495.422	5681.844
286.000	296.493	320.999	369.331	1356.292	6230.105
291.937	299.067	328.521	371.773	1233.295	6435.393
300.608	299.694	334.431	373.027	1171.753	6596.274
301.903	300.952	335.720	376.796	1164.792	6621.261
303.462	301.767	338.631	378.724	1076.119	7156.557
305.025	302.319	340.612	386.383	1028.903	7411.304
