# Supplementary material for: A composition-dependent molecular clutch between T cell signaling condensates and actin
Source: eLife journal article supplement (doi:10.7554/elife.42695), 2019-07-03
Supplement: supp [file elife-42695-supp-v1.zip › elife_poa_e42695_Figure_3_source_data_2.txt]

100nM His-pLAT	100nM His-Nck Basic	100nM His-Nck WT	100nM His-Nck GGSA	100nM His-Nck KtoE
1611.619	8105.079	5413.208	1284.381	1180.970
1583.633	8247.603	5748.006	1540.861	1175.725
1417.217	7203.481	6028.261	1618.181	1174.018
1338.967	9019.197	6275.712	1642.291	1149.609
1354.550	9145.559	5509.870	1542.806	1146.342
1434.146	9268.777	6734.980	1628.485	1139.478
1426.710	8964.197	6428.198	1709.698	1137.247
1343.067	8767.925	5635.540	1682.740	1143.948
1312.988	9099.054	6653.265	1610.186	1146.746
