# Supplementary material for: A composition-dependent molecular clutch between T cell signaling condensates and actin
Source: eLife journal article supplement (doi:10.7554/elife.42695), 2019-07-03
Supplement: supp [file elife-42695-supp-v1.zip › elife_poa_e42695_Figure_3_source_data_3.txt]

50nM His-WIPNWASP-GGS	50nM His-WIPNWASP-WT	50nM His-WIPNWASP-DB
705.758	1727.590	13587.963
733.334	1768.593	13801.969
746.498	1783.428	14504.134
774.389	1823.411	14597.065
775.303	1865.930	14625.945
776.746	1926.671	14947.209
808.098	1974.603	15370.600
828.867	1982.171	15454.151
834.767	2107.129	15589.141
836.590	2144.536	15783.685
839.790	2158.672	15880.814
871.689	2186.964	15915.043
897.034	2241.376	16003.437
929.088	2558.658	16104.496
937.188	2563.149	16172.701
