# Supplementary material for: A composition-dependent molecular clutch between T cell signaling condensates and actin
Source: eLife journal article supplement (doi:10.7554/elife.42695), 2019-07-03
Supplement: supp [file elife-42695-supp-v1.zip › elife_poa_e42695_Figure_4_source_data_1.txt]

Cell Number	Percent Perpendicular to IS Edge	Percent Perpendicular to IS Edge	Percent Perpendicular to IS Edge
0.950	0.60911602	0.03229540	1448
0.850	0.57557911	0.04683100	2547
0.750	0.54873803	0.05269146	2298
0.650	0.48756976	0.04085531	1971
0.550	0.46209386	0.02859653	1662
0.450	0.44341995	0.02894073	1193
0.350	0.43942731	0.03769677	908
0.250	0.44501718	0.03605216	582
0.150	0.35820896	0.03983048	335
0.050	0.39814815	0.12280340	108
