# Supplementary material for: A composition-dependent molecular clutch between T cell signaling condensates and actin
Source: eLife journal article supplement (doi:10.7554/elife.42695), 2019-07-03
Supplement: supp [file elife-42695-supp-v1.zip › elife_poa_e42695_Supplementary_file_1.xlsx]

## Sheet: Template
Reagent type. Duplicate rows as needed. Order is flexible, but row titles must be preserved. Species (mandatory if applicable). Append in parentheses. First mention, use full genus. Sex (if applicable). Add within parentheses after species.	Designation. Symbol/name used in publication. Separate multiple entries with semi-colon, space. (If semi-colon within designation, delimit wtith double quotes.)	Source (public). Stock center, company, data repository. Reference. Include PMID or DOI; use “this paper” if new. If neither applies enter “other” and explain in Additional Information.	Identifiers. Format as ID_source:identifier. Separate multiple entries with semi-colon, space. Include catalog numbers, stock numbers, database IDs or accession numbers, RRIDs.	Additional information. Mandatory if column C entry is “this paper” or “other”. Description of new reagent; laboratory from which reagent obtained; other pertinent information. For antibodies, indicate dilution and conditions used.
Key Resources Table
Reagent type (species) or resource	Designation	Source or reference	Identifiers	Additional information
strain, strain background ()	BL21(DE3) competent E. coli	New England Biolabs		Competent bacteria used for proteins expressed for the in vitro experiments described in this study (See Table 1 for protein information).
Cell line (Homo sapiens)	HEK 293T cells	Obtained from K. Jaqaman UT Southwestern Medical Center	RRID: CVCL_0063
Cell line (Homo sapiens)	Jurkat T cells	Obtained from A. Weiss UCSF	RRID: CVCL_0376
Antibody	OKT3	Thermo Fisher Scientific	13-0037-82, RRID: AB_2619696	Biotinylated anti-CD3 epsilon mouse monoclonal antibody
Recombinant DNA reagent	pMD2.G lentiviral plasmid	Other	Addgene 12259
Recombinant DNA reagent	pCMV-dR8.91	Other	Addgene 8455
Recombinant DNA reagent	LAT-mCitrine	This paper		Full length human LAT with a C terminal mCitrine fusion
Recombinant DNA reagent	LAT-mCherry	This paper		Full length human LAT with a C terminal mCherry fusion
Recombinant DNA reagent	Grb2-mCherry	This paper		Full length human Grb2 with a C terminal mCherry fusion
Recombinant DNA reagent	Grb2-Basic-mCherry	This paper		Full length human Grb2 fused to the basic region of human N-WASP (aa 186-200), doubled (KEKKKGKAKKKRLTKGKEKKKGKAKKKRITK), with a C terminal mCherry fusion
Recombinant DNA reagent	Nck-sfGFP	This paper		Full length human Nck with a C terminal sfGFP fusion
Recombinant DNA reagent	LifeAct-BFP	This paper		LifeAct with a C terminal BFP fusion
Peptide, recombinant protein	ICAM-His	Thermo Fisher Scientific	10346H03H50	Recombinant ICAM1 Human Protein, hlgG1-Fc.His Tag
Peptide, recombinant protein	Rhodamine-Actin	Cytoskeleton, Inc	AR05-B	Purified Rabbit Muscle Actin covalently linked with Rhodmine dye
Chemical compound, drug	SMIFH2	Sigma-Aldrich	S4826-5MG	Formin inhibitor
Chemical compound, drug	SiR-Actin	Cytoskeleton, Inc.	CY-SC001	Cell-permeable F-actin dye used for polarization microscopy
Chemical compound, drug	Alexa Fluor 488 C5 maleimide	Thermo Fisher Scientific	A10254
Chemical compound, drug	Streptavidin, Alexa Fluor 647 conjugate	Thermo Fisher Scientific	S21374	Used for live-cell microscopy
Chemical compound, drug	Leupeptin	Bachem	N-1000.0100	Protein purification
Chemical compound, drug	Antipain	Sigma-Aldrich	A6191-100MG	Protein purification
Chemical compound, drug	PMSF	Sigma-Aldrich	P7626-25G	Protein purification
Chemical compound, drug	Pepstatin	Sigma-Aldrich	P4265-100MG	Protein purification
Software, algorithm	FIJI	https://fiji.sc	RRID: SCR_002285
Software, algorithm	Matlab	Mathworks
Software, algorithm	Matlab plugin for analyzing polarization microscopy data	Shalin Mehta (Mehta et al., 2016; Nordenfelt et al., 2017)	2014a
Software, algorithm	Prism v7	GraphPad	RRID: SCR_002798
Software, algorithm	Metamorph v7.8.4.0	Molecular Devices	RRID: SCR_002368
Software, algorithm	Adobe Illustrator CC	Adobe	RRID: SCR_010279
Other	96-well Matriplate	Brooks	MGB096-1-2-LG-L
Other	Ni2+-DGS-NTA	Avanti	790404C
Other	POPC	Avanti	850457C
Other	PEG5000-PE	Avanti	880230C
Other	L-⍺-phosphatidylserine (Brain, Procine)	Avanti	840032C
Other	DSPE-PEG(2000) Biotin	Avanti	880129C
Other	Hamilton Syringes	Hamilton		10 µl, 25 µl, 100 µl, 250 µl syringes were most useful for preparing SUVs
Other	4 ml Thermo Fisher National Glass Sample Vials	Thermo Fisher Scientific	03-391-7B	Used for preparing SUVs
Other	Chloroform,anhydrous, >=99%, contains 0.5-1.0% ethanol as stabilizer	Sigma-Aldrich	288306-100ML	Used for preparing SUVs
Other	DMEM	Thermo Fisher Scientific	11965-118
Other	RPMI 1640	Thermo Fisher Scientific	11875-119
Other	RPMI 1640 no phenol red	Thermo Fisher Scientific	11835-030	Used for live-cell microscopy
Other	Fetal Bovine Serum	GE Healthcare Life Sciences	SH30910.03
Other	HEPES (1M)	Thermo Fisher Scientific	15630-080	Buffered media used for live-cell microscopy
Other	Penicillin / Streptomycin	Thermo Fisher Scientific	15140-122
Other	Lipofectamine	Thermo Fisher Scientific	11668-019	Lentivirus production
Other	β-mercaptoethanol	Sigma-Aldrich	M6250-100ML	Protein purification and storage
Other	TCEP	Soltec Ventures	M115	Protein purification, storage, and in vitro assays
Other	DTT	Gold Biotechnologies	DTT100	Protein purification
Other	NaCl	Thermo Fisher Scientific	S271-10	Protein purification and storage
Other	KCl	Sigma-Aldrich	P9541-5KG	Protein purification, storage, and in vitro assays
Other	HEPES	Sigma-Aldrich	H3375-1KG	Protein purification, storage, and in vitro assays
Other	Tris base	Thermo Fisher Scientific	BP152-5	Protein purification
Other	Imidazole	Sigma-Aldrich	I202-2KG	Protein purification
Other	Sodium Phosphate	Sigma-Aldrich	S8282-1KG	Used to make PBS for cellular and in vitro assays
Other	Potassium Phosphate	Thermo Fisher Scientific	AC44767-0050	Used to make PBS for cellular and in vitro assays
Other	Ni-NTA agarose resin	Qiagen	30250	Protein purification
Other	GE Healthcare Glutathione sepharose 4B resin	Thermo Fisher Scientific	45-002-065	Protein purification
Other	Source 15Q resin	GE Healthcare Life Sciences	17-0947-05	Protein purification
Other	Source 15S resin	GE Healthcare Life Sciences	17-0944-05	Protein purification
Other	Superdex 75 Increase GL column	GE Healthcare Life Sciences	29-1487-21	Protein purification
Other	Superdex 75 prepgrade size exclusion column	GE Healthcare Life Sciences	28-9893-34	Protein purification
Other	Superdex 200 GL column	GE Healthcare Life Sciences	17-5175-01	Protein purification
Other	Superdex 200 prepgrade size exclusion column	GE Healthcare Life Sciences	28-9893-36	Protein purification

## Sheet: Notes
Introduction
The Key Resources Table is designed to highlight the reagents and resources used in a specific study. Please include the genetically modified organisms and strains, cell lines, reagents, and software that are essential to reproduce the results presented. Note that datasets should be included in the datasets section of the submission form.
Please include a completed Key Resources Table at the start of the Materials and Methods section within your article file (this table does not need to be numbered). For consistency, please do not add subheadings to the table. Any references in the Source column should also be included in the list of references. Datasets should be entered within the datasets section of the submission form. A table…
The Key Resources Table does not need to be an exhaustive list of all the materials and resources used (e.g., essential chemicals and standard culture media do not need to be included). Please ensure that the items listed in the table are reported in the Materials and Methods section within the context of their use. We suggest that no more than ten primers and RNA sequences are included in this t…
Guidelines for creation of the Key Resources Table
Some of the constraints below are imposed to allow automated parsing of the table.
Columns (general):
(1) Column order and headings must be preserved.
(2) Columns A-E should not be removed, even if not used.
(3) Columns can be appended (F, G, etc.) for internal use.
Rows (general):
(1) Row titles (preceding the parentheses) must be preserved.
(2) Row one (column headings) should not be removed.
(3) Row 2 (headings with instructions) can be removed.
(4) Order of the rows can be changed.
(5) Clustering of multiple reagents of one type recommended, but is not mandatory.
(6) Reagent types indicated on template that are not used can be removed.
(7) Reagent types not represented in the template: use “other”.
Column A: Reagent type (mandatory)
(1) Row title (preceding parentheses) cannot be changed.
(2) See descriptions of categories in “Reagent categories” section below.
(3) If appropriate, include species within parentheses. Use full genus and full species for first mention; thereafter, initial for genus may be used.
(4) If appropriate, indicate sex after species (within the parentheses); separate by comma, space.
(5) See additional information in the section “Rows (general)” above.
Column B: Symbol/name used in publication (mandatory)
(1) This is a free-text field; there are no formatting constraints, except for separation of multiple entries by semi-colon, space.
(2) Should indicate exactly how the reagent is referred to in the publication. If several designations are used for one reagent, can include more than one entry, separated by semi-colon, space. If one designation has been used to refer to several different reagents, list each reagent separately and include a unique identifier or description parenthetically.
(3) If there is a semi-colon within the designation used, add double quotes around the entire phrase.
(4) Additional defining information can be included parenthetically (if brief).
Columns C: Source (mandatory)
(1) If reagent obtained from a public source, such as a stock center or company, list resource name.
(2) If not obtained from public source, but a published description is available, list the DOI or PMID for the publication.
(3) If reagent newly created in the publication, enter “this paper”.
(4) If none of the above, enter “other” and explain in Additional Information (Column E).
(5) If it is appropriate to indicate both a publication and a lab or researcher that provided the reagent, list the publication in this field and the lab or researcher in Additional Information.
Column D: Identifiers (not mandatory; use if possible)
(1) Use the format “ID_source:identifier” with a colon and no spaces. Separate multiple entries with a semi-colon, space.
(2) If possible, use the recommended abbreviation for the ID_source (see below).
(3) Multiple identifiers, even if redundant, are useful for validation. In some case a more general identifier (for a stock, for instance) can be combined with a more precise identifier (for the allele of interest in that stock).
(4) Inclusion of database identifiers is strongly encouraged to facilitate accurate incorporation of published data into appropriate biological databases.
Column E: Additional information
(1) Mandatory if column C entry is “this paper” or “other”. Description of new reagent or laboratory from which reagent obtained. (Free text)
(2) For antibodies, indicate dilution in parentheses (to avoid auto-formatting problems).
(3) Other pertinent information, including pointers to supplementary information or Methods section, if appropriate. (Free text)
Additional columns can be added for internal purposes (and removed prior to submission for publication): tracking acquisition by the lab, lab-specific stock numbers, storage location in the lab, comments about problems or QC, etc.
Reagent and resource categories
● Gene (indicate species) - not strictly a reagent, but unambiguous identification critical for genetic research and genetic databases.
● Strain, strain background (indicate species) - applies to whole organism; includes bacterial and virus strains or isolates. Indicate sex, if applicable.
● Genetic reagent (indicate species) - applies to mutations and variants in whole organism, including transgenically introduced constructs. For transgenic lines, indicate host species. Indicate sex, if applicable.
● Cell line (indicate species) - if a primary cell line, describe in Additional Information. Indicate sex, if applicable.
● Transfected construct (indicate species) - in cell line. Generally, indicate species of cell line; use species of construct component if that is more relevant and explain in Additional Information.
● Biological sample (indicate species) - any other biological entity, ranging from isolated tissue to defined population; describe in Additional Information. Indicate sex, if applicable.
● Antibody - include host organism common name and clonality (e.g., “mouse monoclonal”); include dilution used in Additional Information (within parentheses to avoid auto-formatting problems).
● Recombinant DNA reagent - traditional cultured clones, plasmids, cDNAs, etc., including recombinant DNA libraries.
● Sequence-based reagent - oligonucleotides, primers, morpholinos, etc.; indicate sequence.
● Peptide, recombinant protein - generally, commercially available reagents.
● Chemical compound, drug - generally, commercially available reagents.
● Commercial assay, kit - detection assays; labeling and sample preparation kits.
● Software, algorithm - newly created or previously existing.
● Other - miscellaneous other categories, including histological stains.

## Sheet: Example
Reagent type. Duplicate rows as needed. Order is flexible, but row titles must be preserved. Species (mandatory if applicable). Append in parentheses. First mention, use full genus.	Designation. Symbol/name used in publication. Separate multiple entries with semi-colon, space. (If semi-colon within designation, delimit wtith double quotes.)	Source (public). Stock center, company, data repository. Reference. Include PMID or doi; use “this paper” if new. If neither applies enter “other” and explain in Additional Information.	Identifiers. Format as ID_source:identifier. Separate multiple entries with semi-colon, space. Include catalog numbers, stock numbers, database IDs or accession numbers, RRIDs.	Additional information. Mandatory if column C entry is “this paper” or “other”. Description of new reagent; laboratory from which reagent obtained; other pertinent information.
Key Resources Table
Reagent type (species) or resource	Designation	Source or reference	Identifiers	Additional information
gene (Drosophila melanogaster)	nito	NA	FLYB:FBgn0027548
gene (D. melanogaster)	Sxl	NA	FLYB:FBgn0264270
genetic reagent (D. melanogaster)	MTD-Gal4	Bloomington Drosophila Stock Center	BDSC:31777; FLYB:FBtp0001612; RRID:BDSC_31777	FlyBase symbol: P{GAL4-nos.NGT}
genetic reagent (D. melanogaster)	ap-Gal4	Bloomington Drosophila Stock Center	BDSC:3041; FLYB:FBti0002785; RRID:BDSC_3041	FlyBase symbol: P{GawB}ap[md544]
genetic reagent (D. melanogaster)	nub-Gal4	PMID:20798049	FLYB:FBti0016825	FlyBase symbol: P{GawB}nubbin-AC-62
genetic reagent (D. melanogaster)	dome-Gal4	PMID:12403714	FLYB:FBti0022298	FlyBase symbol: P{GawB}dome[PG14]
genetic reagent (D. melanogaster)	UAS-2xEYFP	PMID:12324968	FLYB:FBtp0016537	FlyBase symbol: P{UAS-2xEYFP}
genetic reagent (D. melanogaster)	nito[HP25329]	Bloomington Drosophila Stock Center	BDSC:22092; FLYB:FBal0238892; RRID:BDSC_22092	Genotype: w[1118]; P{w[+mC]=EPg}nito[HP25329]/CyO
genetic reagent (D. melanogaster)	nito[1]	this paper		Progenitor = nito[HP25329]; imprecise excision; lethal
genetic reagent (D. melanogaster)	nito shRNA (HMJ02081)	Bloomington Drosophila Stock Center	TRiP:HMJ02081; BDSC:56852; RRID:BDSC_56852	FlyBase symbol: P{TRiP.HMJ02081}attP40
genetic reagent (D. melanogaster)	nito dsRNA (VDRC 20942)	Vienna Drosophila RNAi Center	VDRC:20942
genetic reagent (D. melanogaster)	FRT[G13]	Bloomington Drosophila Stock Center	BDSC:1956; FLYB:FBti0001247	FlyBase symbol: P{FRT(whs)}G13
genetic reagent (D. melanogaster)	"y w hsflp; ubiGFP FRT[G13]"	PMID:18160348
cell line (D. melanogaster)	S2	other	FLYB:FBtc0000181; RRID:CVCL_Z992	Cell line maintained in N. Perrimon lab; FlyBase symbol: S2-DRSC.
antibody	anti-Nito	this paper		Rabbit polyclonal; against aa 479-500; used YZ3137 (1:500)
antibody	anti-alpha-Spectrin (mouse monoclonal)	Developmental Studies Hybridoma Bank	DSHB:3A9; RRID:AB_528473	(1:10)
antibody	anti-Vasa (rabbit polyclonal)	Santa Cruz Biotechnology	Santa Cruz:sc-30210; RRID:AB_793874	(1:250)
antibody	anti-Sxl (mouse monoclonal)	Developmental Studies Hybridoma Bank	DSHB:M18; RRID:AB_528464	(1:10)
antibody	anti-GFP (rabbit polyclonal)	Molecular Probes	Molecular Probes:A-6455; RRID:AB_221570	(1:1000)
antibody	anti-GFP (mouse monoclonal)	Molecular Probes	Molecular Probes:A-11120; RRID:AB_221568	(1:200)
antibody	anti-HA (rat monoclonal)	Roche	Roche:3F10; RRID:AB_2314622
antibody	Alexa 488- or 555- secondaries	Molecular Probes		(1:1000)
other	DAPI stain	Molecular Probes		(1:1000)
recombinant DNA reagent	pAGW (Gateway vector)	Drosophila Genomics Resource Center	DGRC:1071
recombinant DNA reagent	pAHW (Gateway vector)	Drosophila Genomics Resource Center	DGRC:1095
recombinant DNA reagent	GH11110 (cDNA)	Drosophila Genomics Resource Center	DGRC:5666
recombinant DNA reagent	GFP-Nito (plasmid)	this paper		Progenitors: GH11110 (cDNA); Gateway vector pAGW
recombinant DNA reagent	HA-Sxl (plasmid)	PMID:16207758		Progentiors: PCR, UAS-Sxl flies; Gateway vector pAHW
recombinant DNA reagent	GFP-Sxl (plasmid)	PMID:16207758		Progentiors: PCR, UAS-Sxl flies; Gateway vector pAGW
