# Supplementary figures and images for: A composition-dependent molecular clutch between T cell signaling condensates and actin
Source: eLife journal article supplement (doi:10.7554/elife.42695), 2019-07-03

**Figure 3 - figure supplement 6**

**A)**

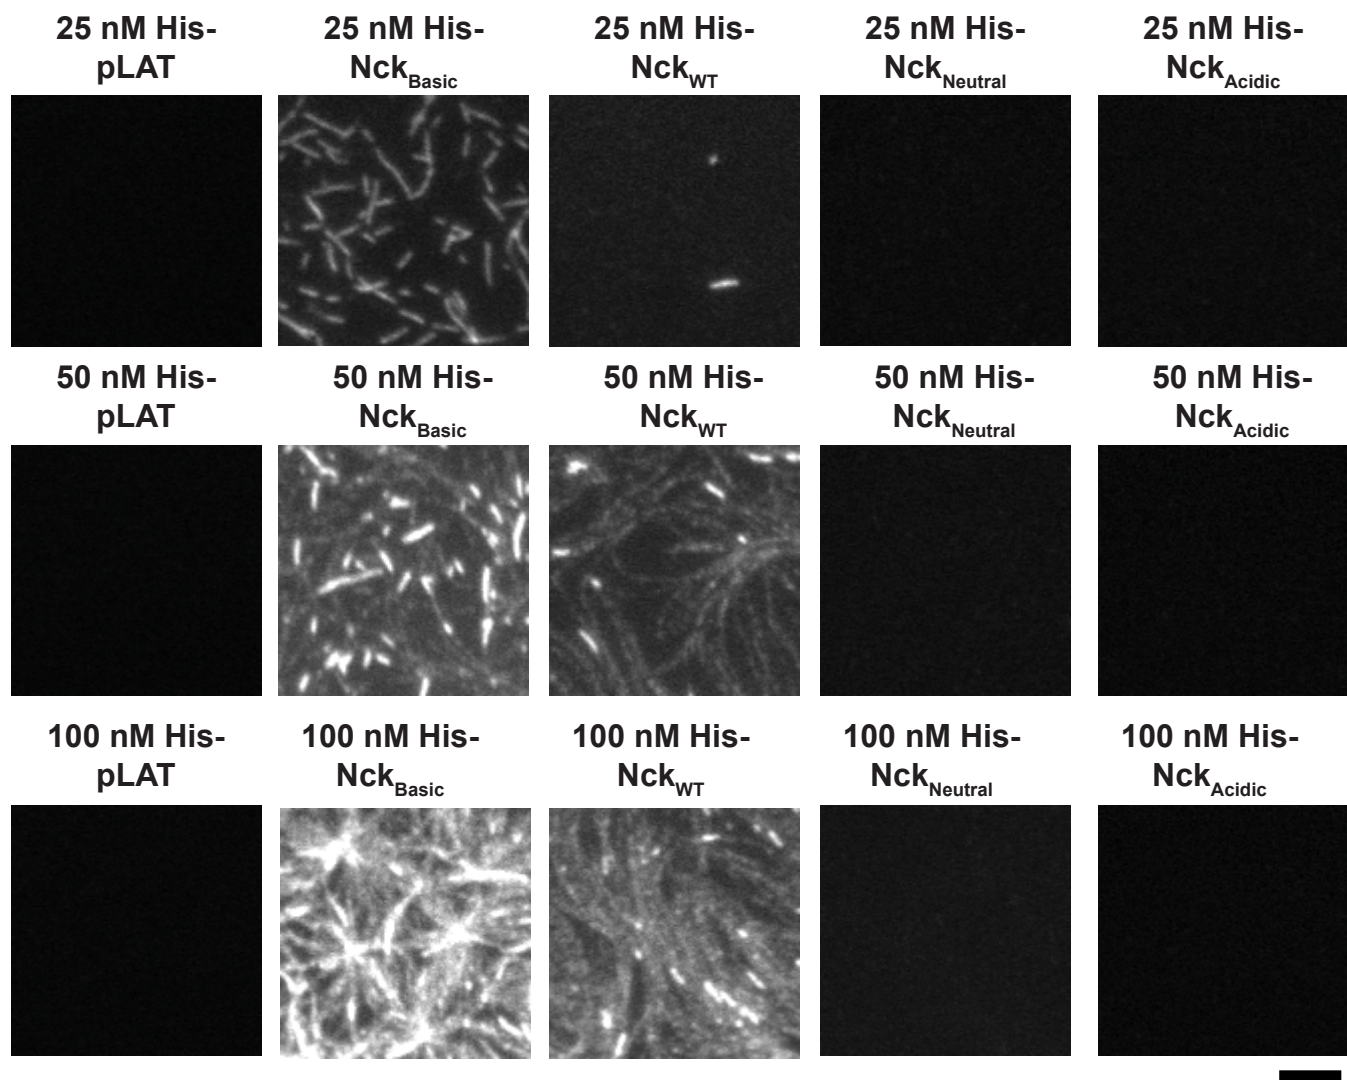

**B)**

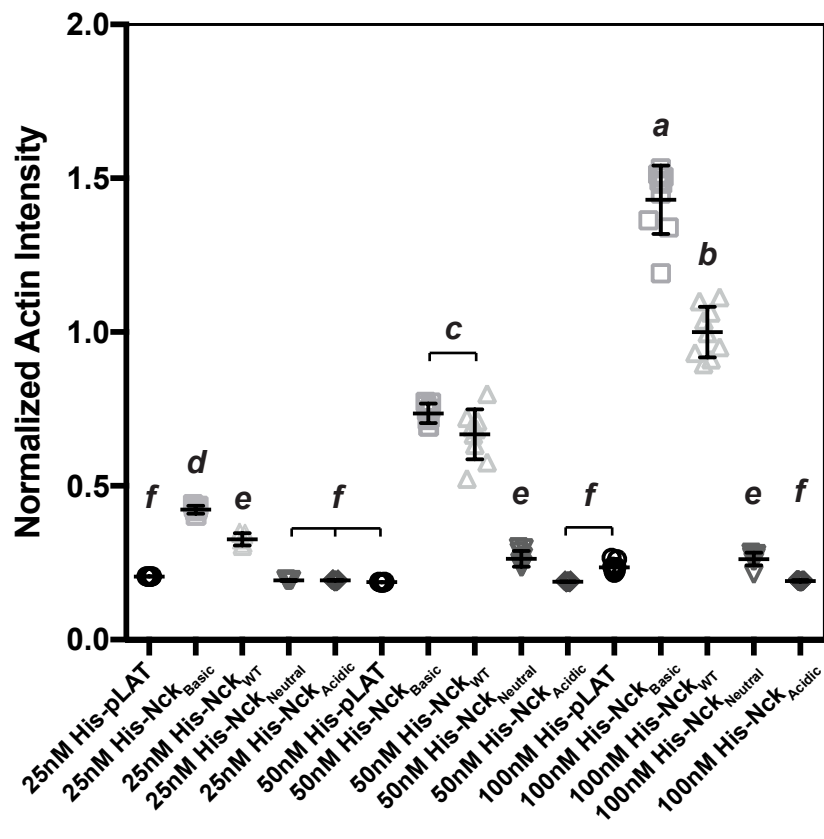

Supplement: supp [file elife-42695-supp-v1.zip]

Figure 3 - figure supplement 1

A)

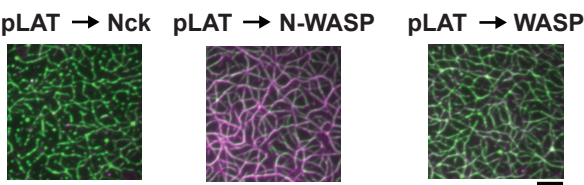

B)

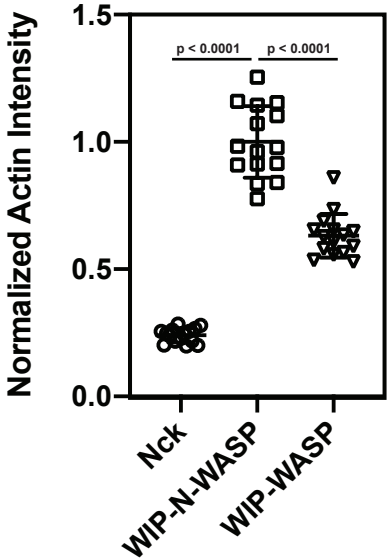

Supplement: supp [file elife-42695-supp-v1.zip]

Figure 4 - figure supplement 1

A)

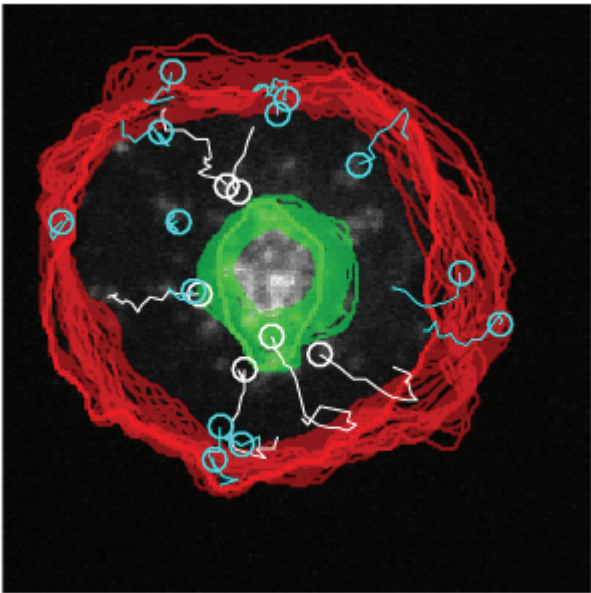

B)

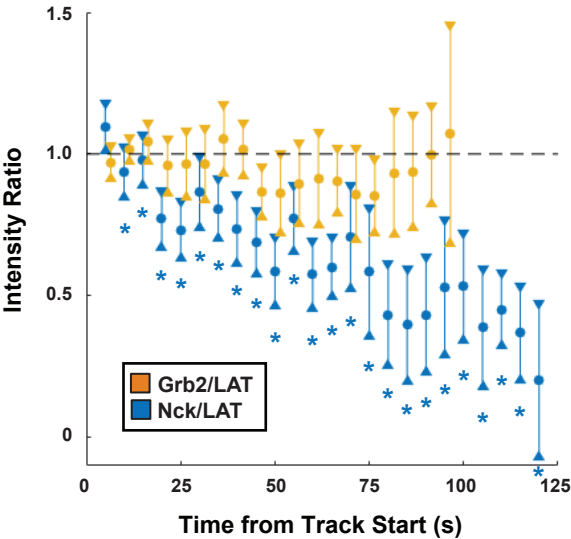

Supplement: supp [file elife-42695-supp-v1.zip › elife_poa_e42695_Figure_4_figure_supplement_1.pdf]

Figure 3 - figure supplement 3

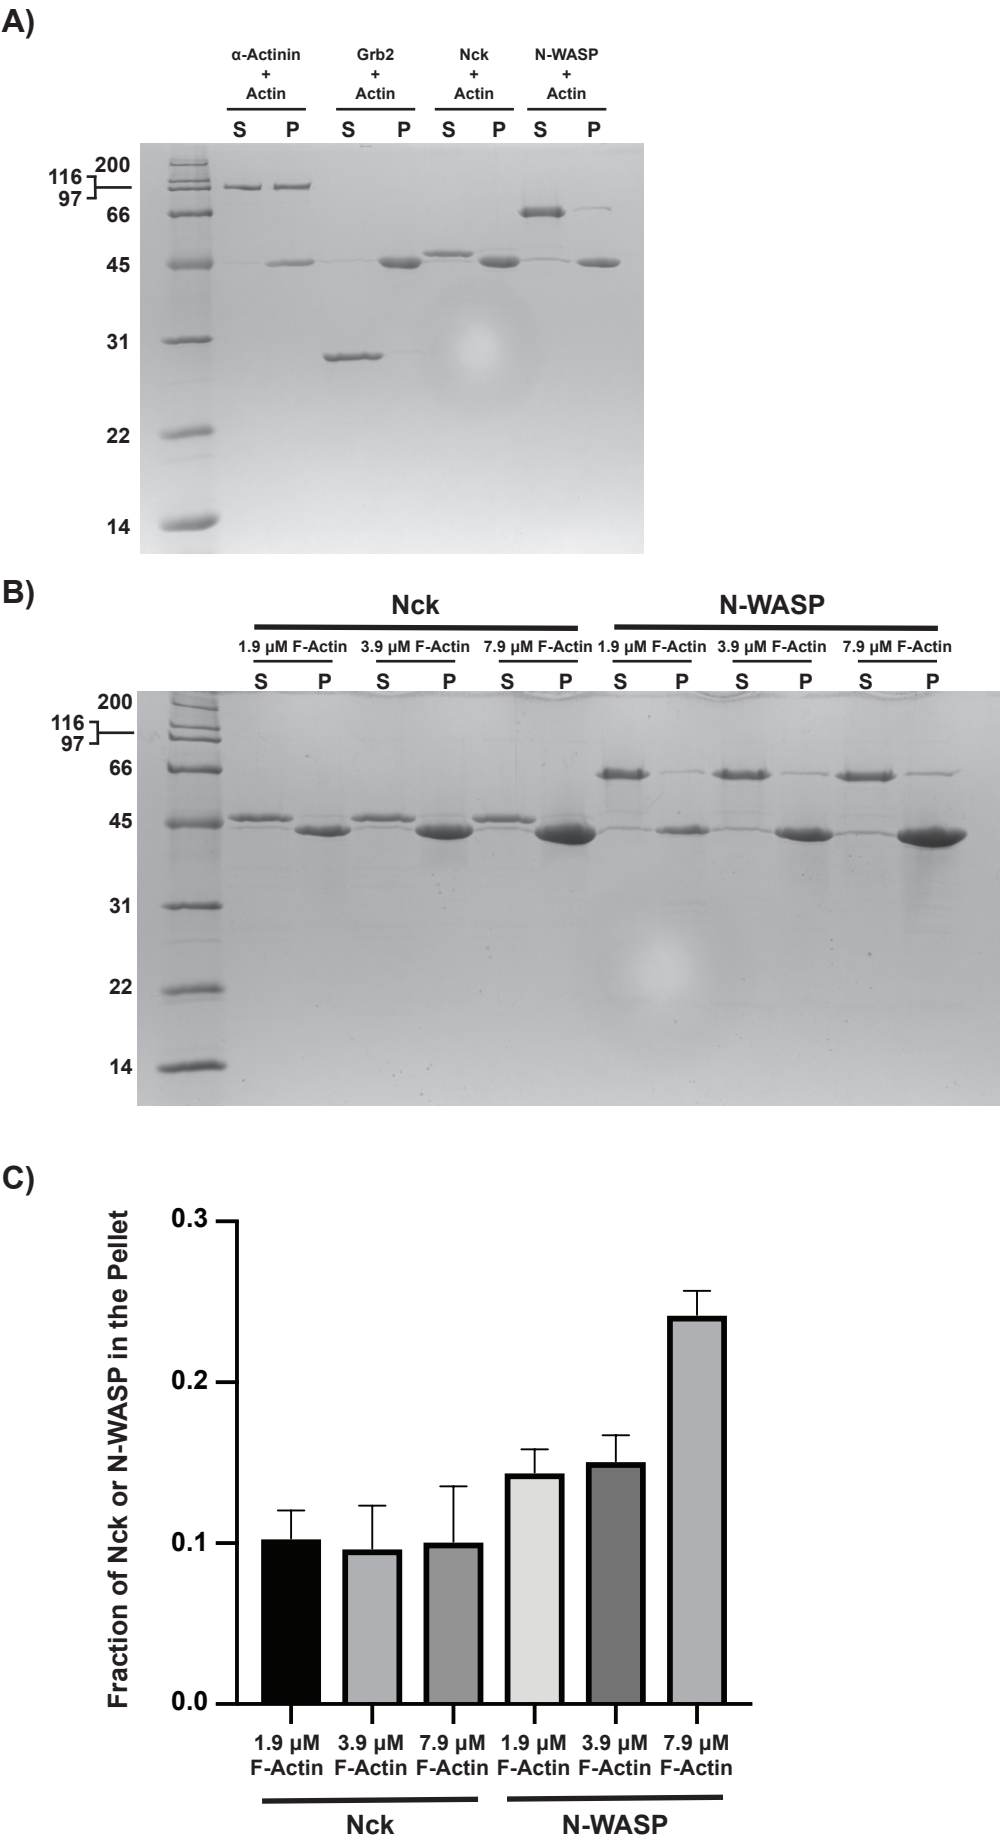

Supplement: supp [file elife-42695-supp-v1.zip › elife_poa_e42695_Figure_3_figure_supplement_3.pdf]

Figure 4 - figure supplement 4

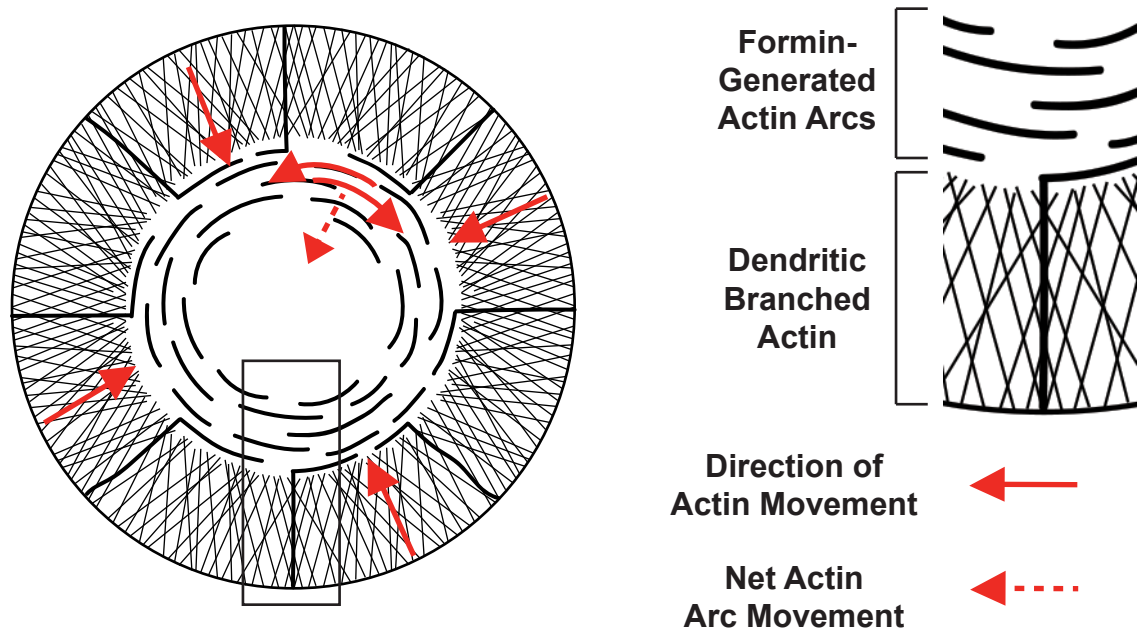

Supplement: supp [file elife-42695-supp-v1.zip › elife_poa_e42695_Figure_4_figure_supplement_4.pdf]

Figure 3 - figure supplement 7

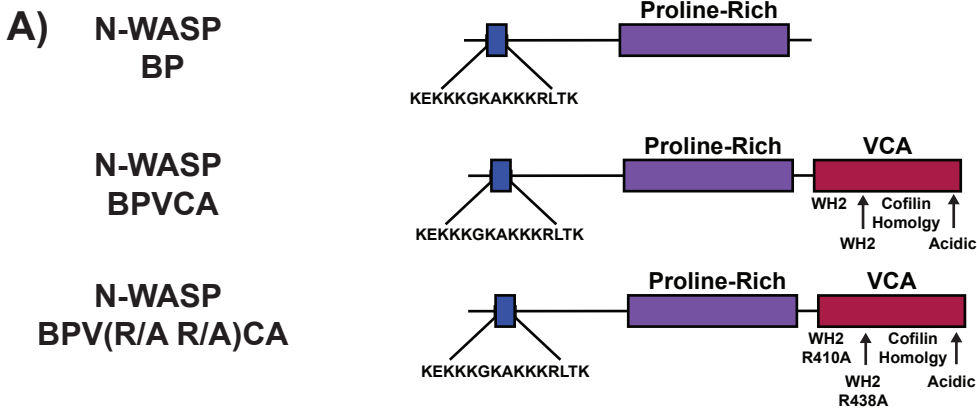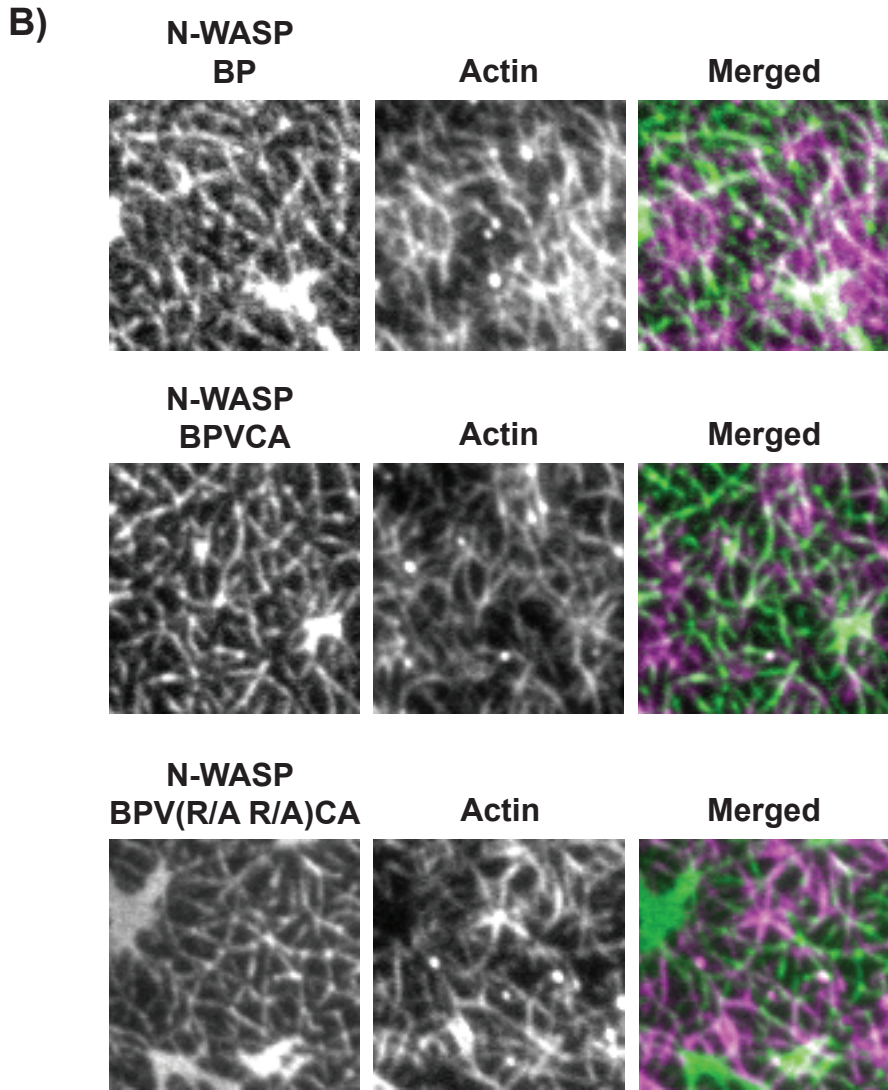

Supplement: supp [file elife-42695-supp-v1.zip › elife_poa_e42695_Figure_3_figure_supplement_7.pdf]

**Figure 6 - figure supplement 1**

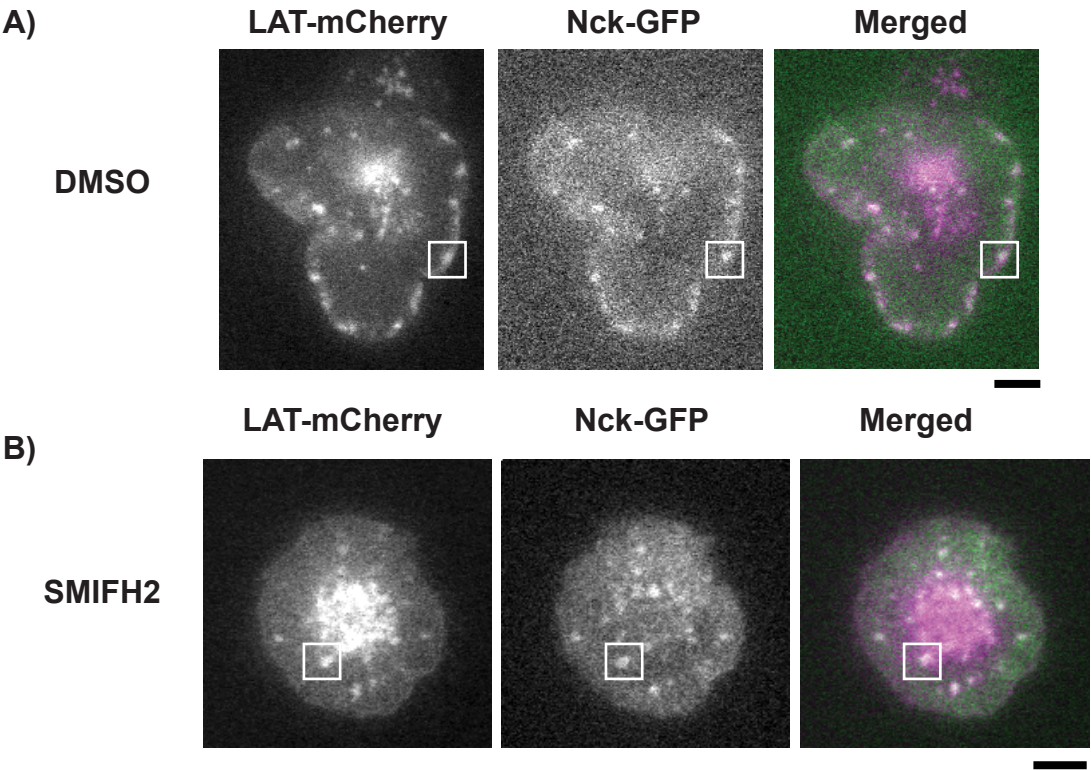

Supplement: supp [file elife-42695-supp-v1.zip › elife_poa_e42695_Figure_6_figure_supplement_1.pdf]

Figure 4 - figure supplement 2

A)

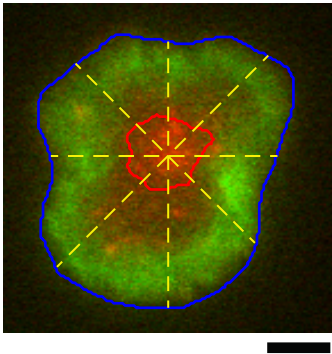

B)

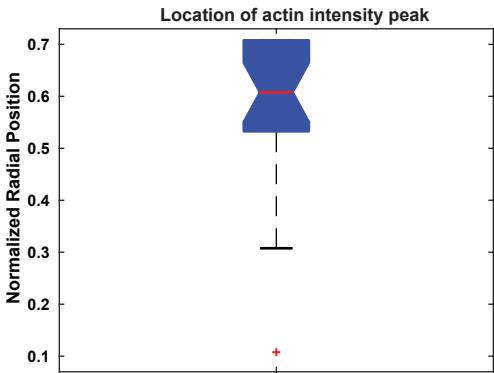

C)

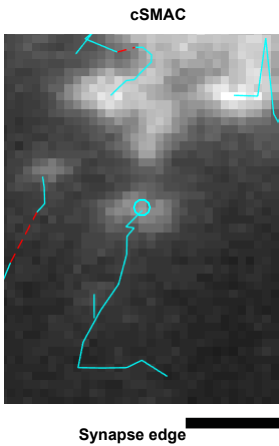

D)

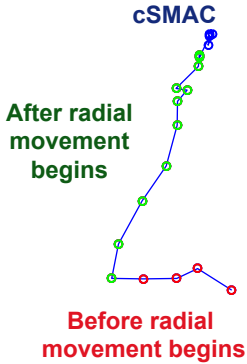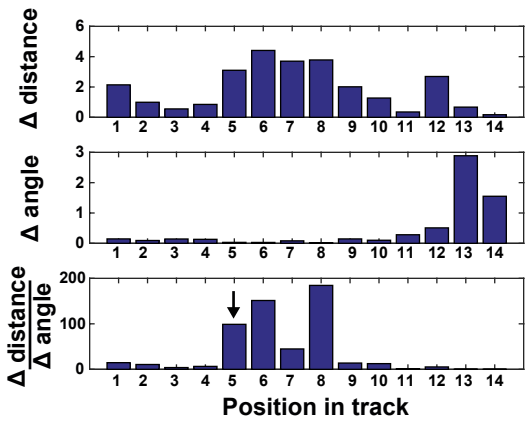

Supplement: supp [file elife-42695-supp-v1.zip › elife_poa_e42695_Figure_4_figure_supplement_2.pdf]

Figure 4 - figure supplement 5

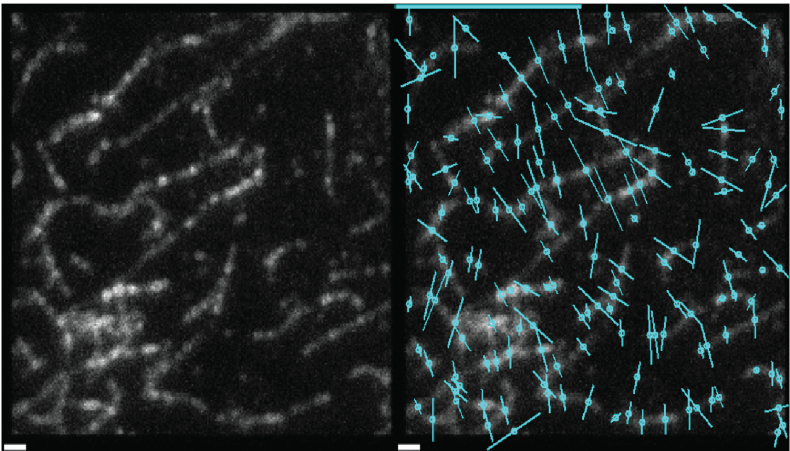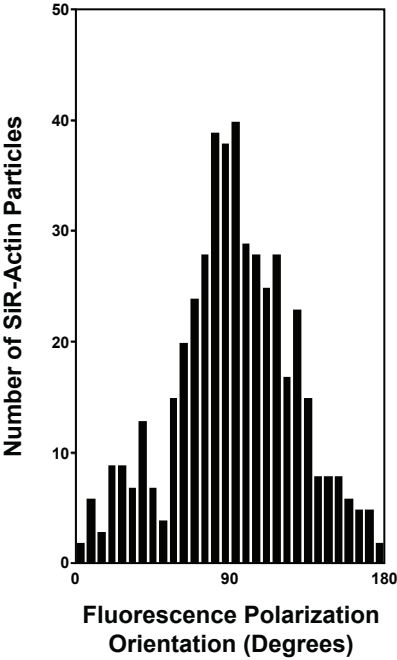

Supplement: supp [file elife-42695-supp-v1.zip › elife_poa_e42695_Figure_4_figure_supplement_5.pdf]

Figure 3 - figure supplement 5

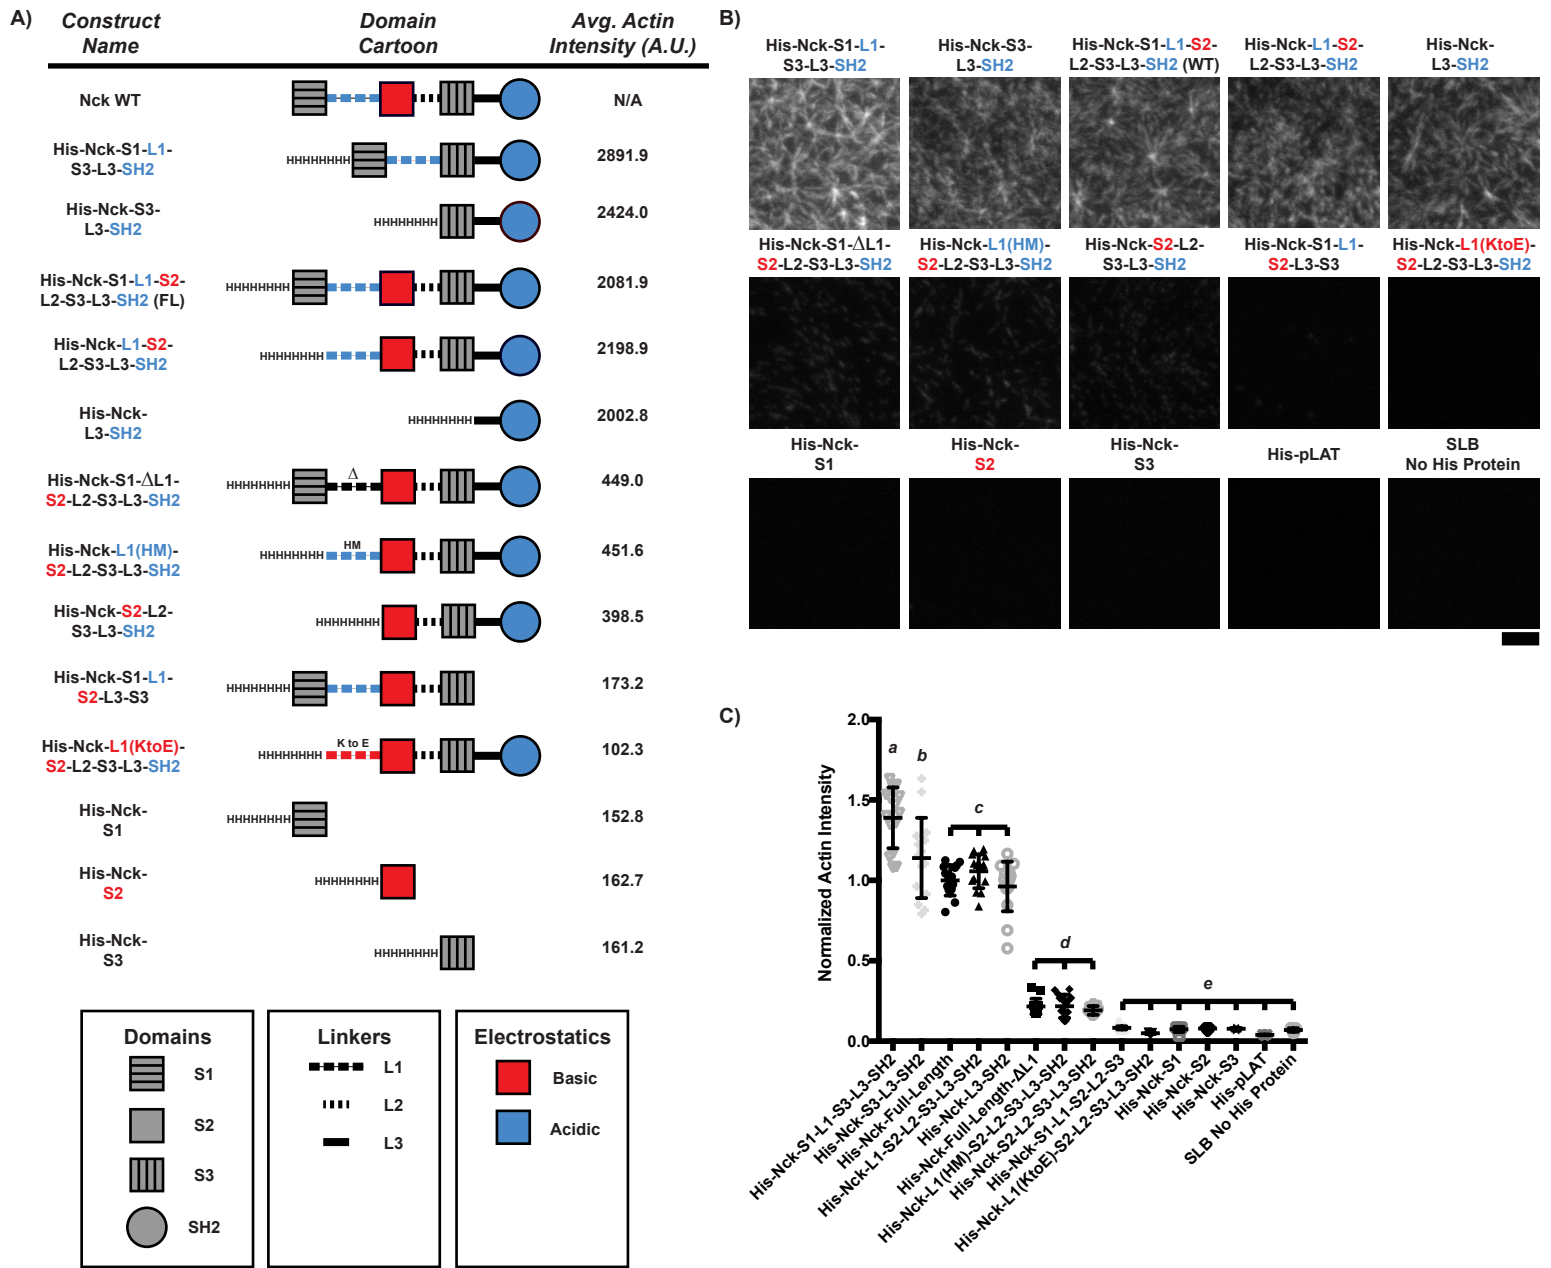

Supplement: supp [file elife-42695-supp-v1.zip › elife_poa_e42695_Figure_3_figure_supplement_5.pdf]

Figure 1 - figure supplement 1

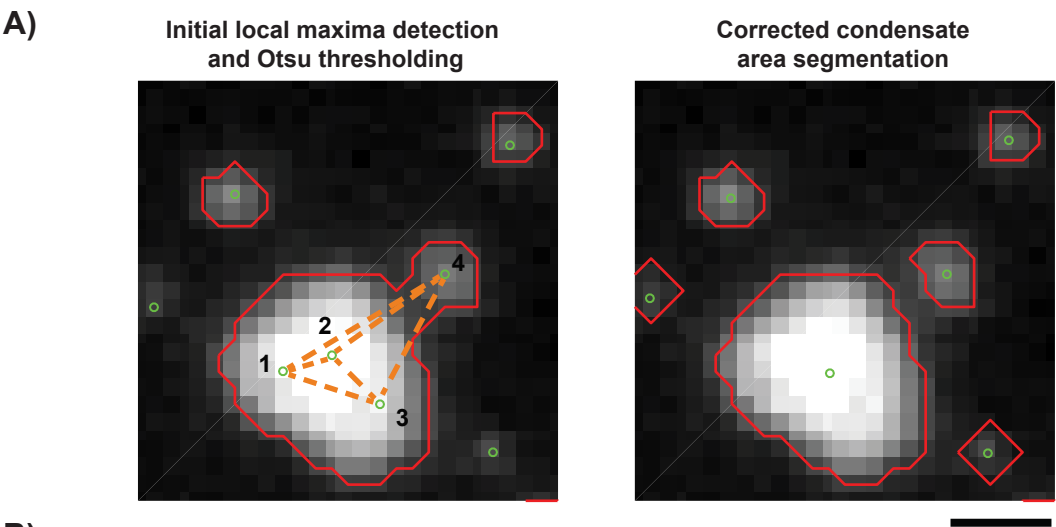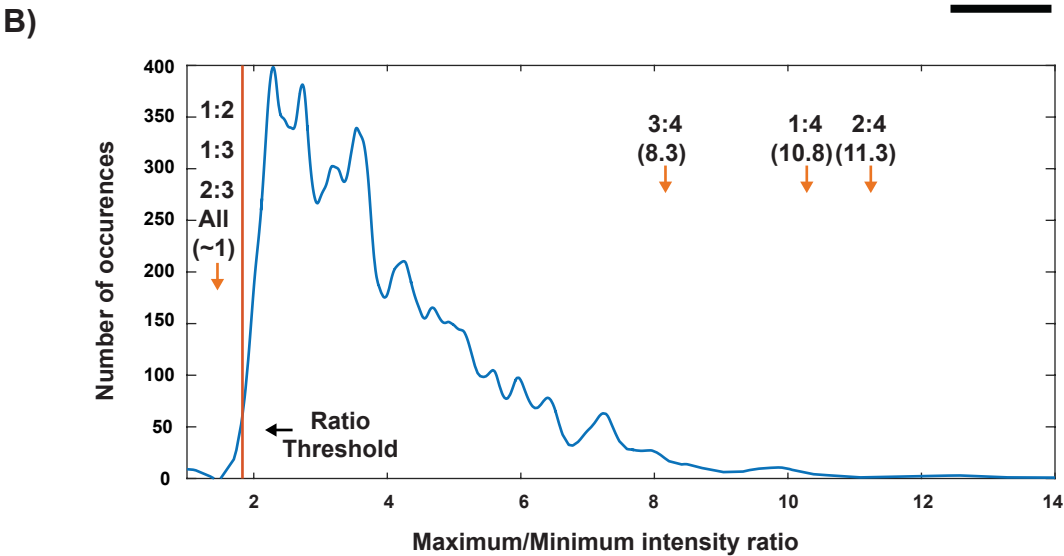

Supplement: supp [file elife-42695-supp-v1.zip › elife_poa_e42695_Figure_1_figure_supplement_1.pdf]

Figure 3 - figure supplement 4

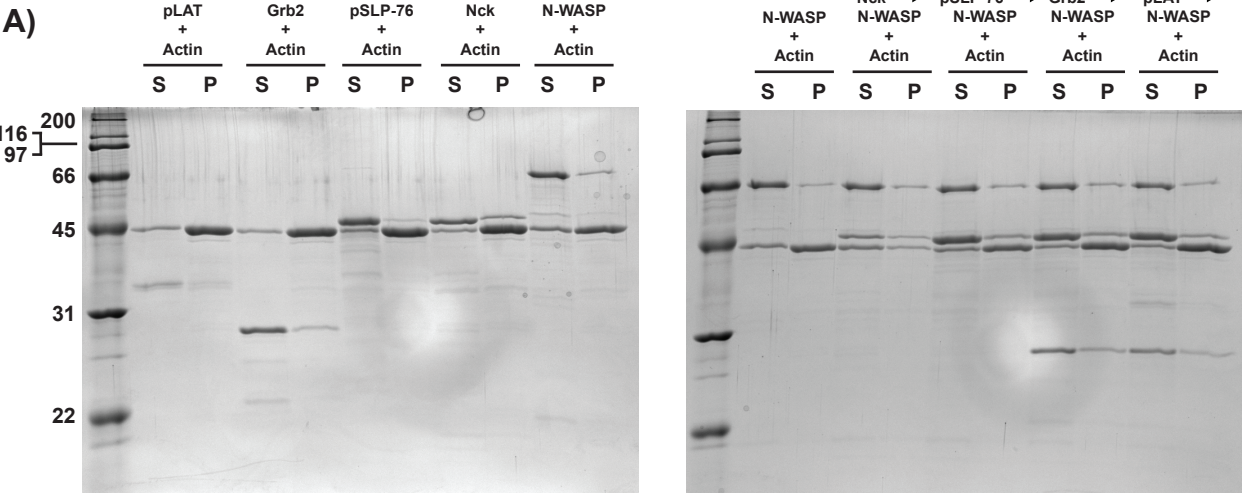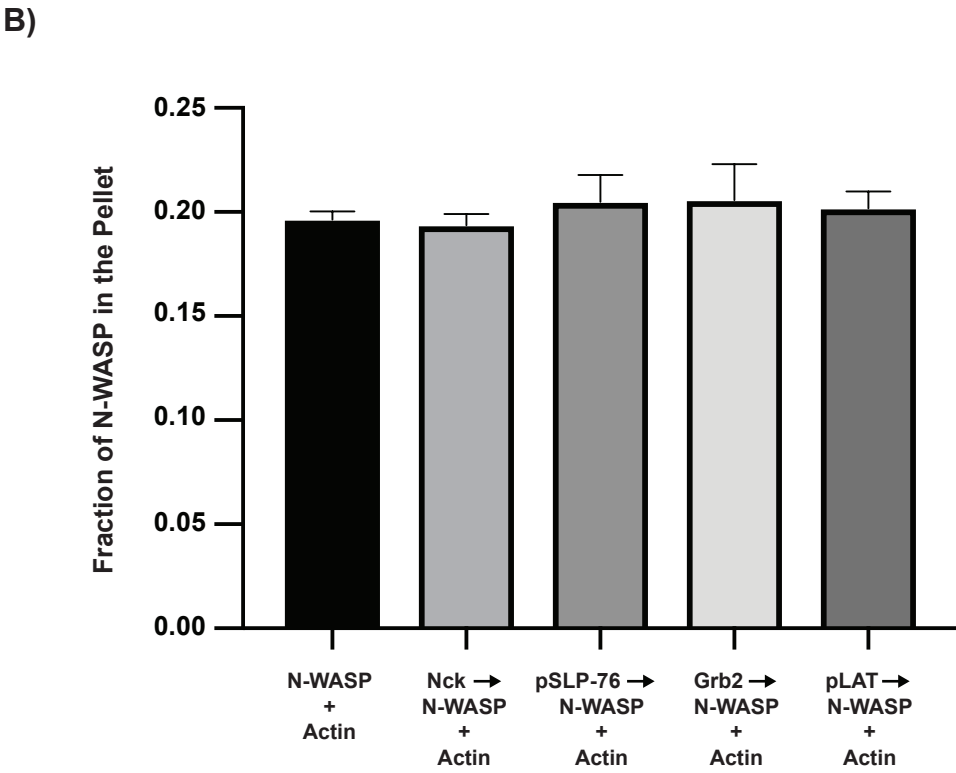

Supplement: supp [file elife-42695-supp-v1.zip › elife_poa_e42695_Figure_3_figure_supplement_4.pdf]

Figure 3 - figure supplement 8

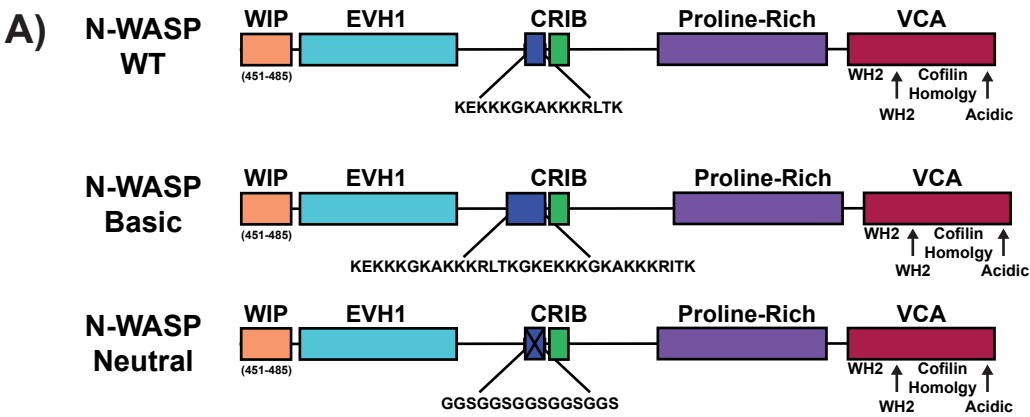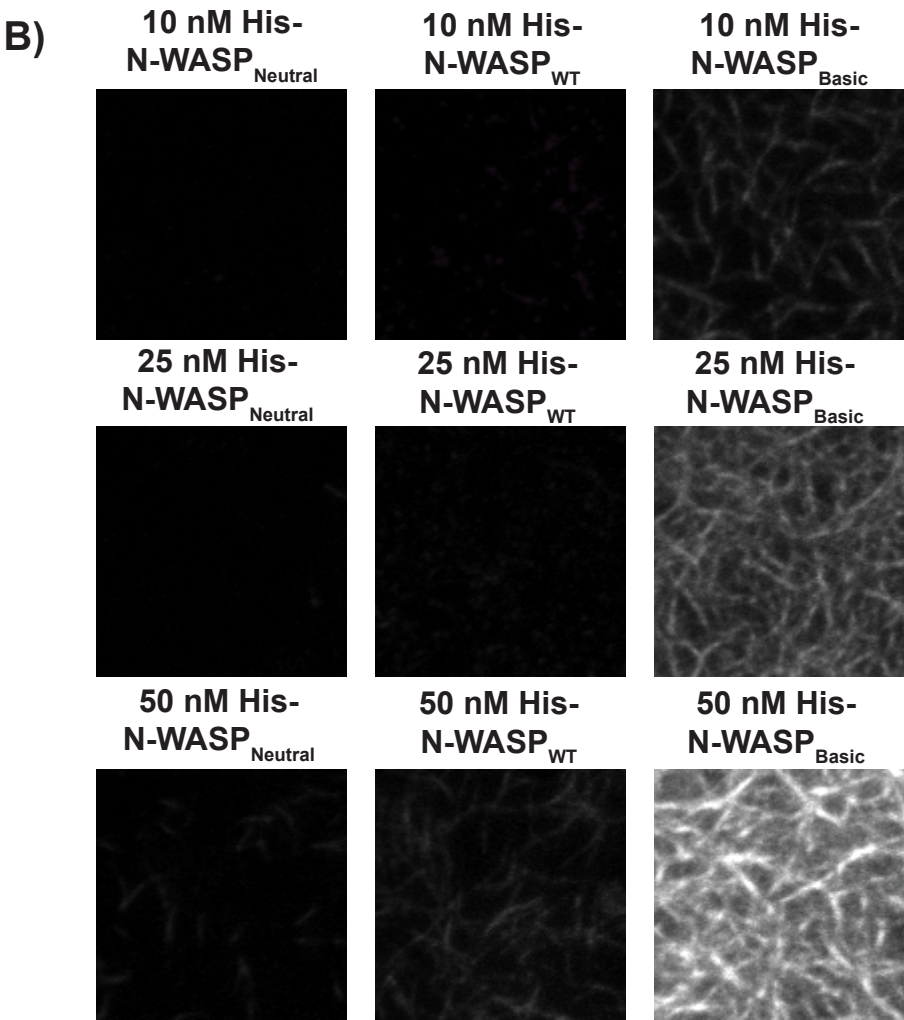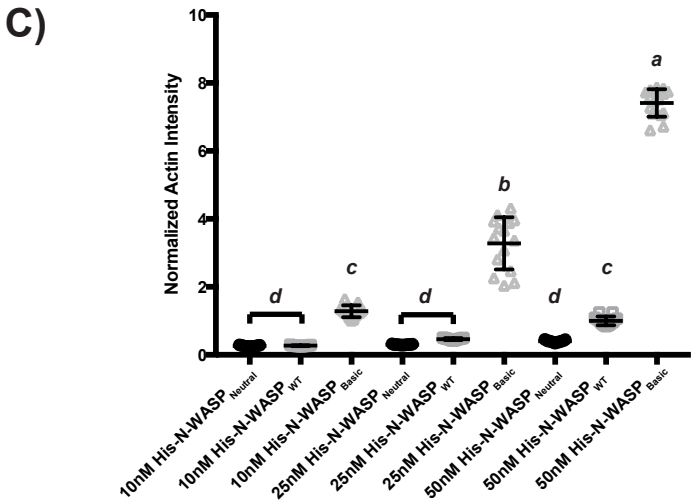

Supplement: supp [file elife-42695-supp-v1.zip › elife_poa_e42695_Figure_3_figure_supplement_8.pdf]

Figure 5 - figure supplement 1

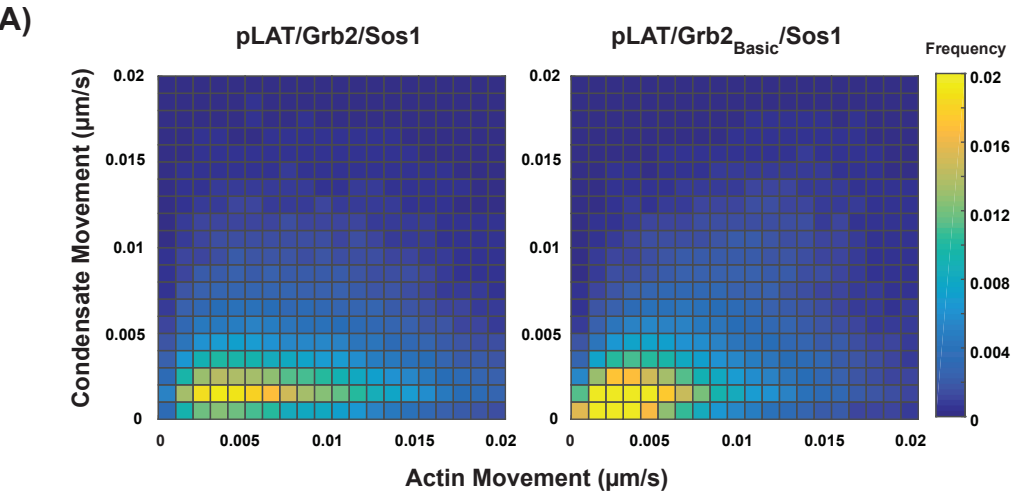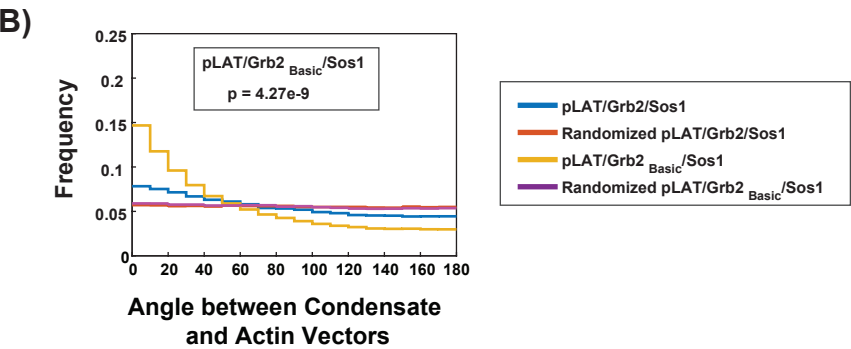

Supplement: supp [file elife-42695-supp-v1.zip › elife_poa_e42695_Figure_5_figure_supplement_1.pdf]
